# Supplementary material for: Mitogenome Phylogenetics: The Impact of Using Single Regions and Partitioning Schemes on Topology, Substitution Rate and Divergence Time Estimation
Source: PubMed Central journal article supplement (PMC3206919; doi:10.1371/journal.pone.0027138), 2011-11-02

# Orcinus

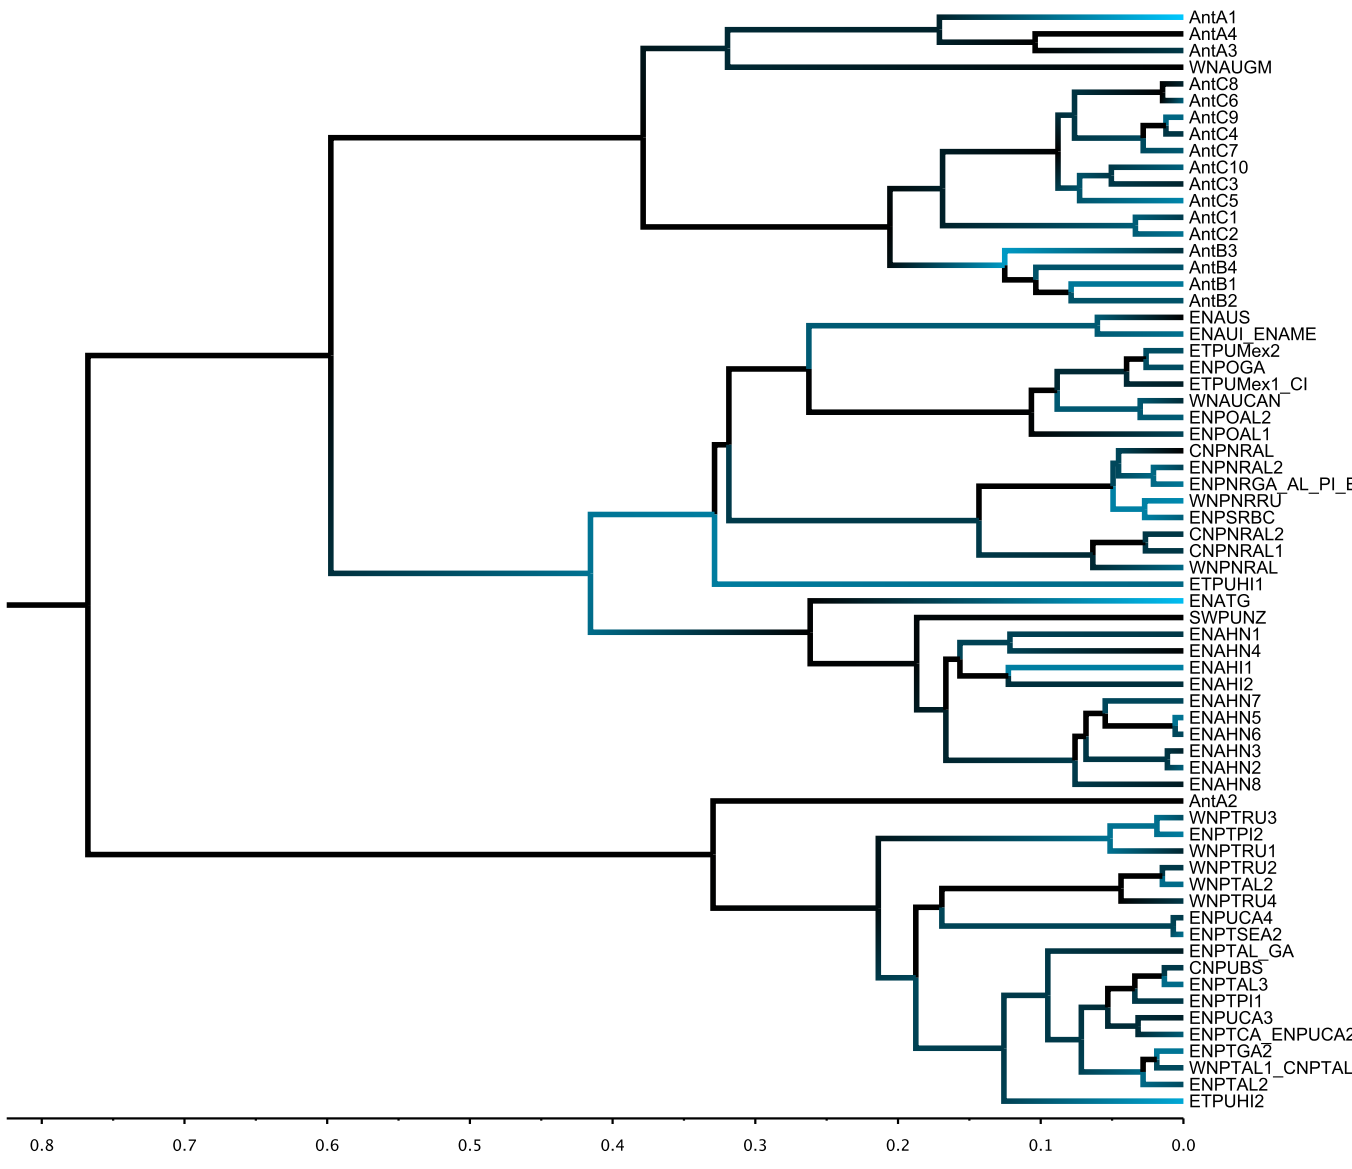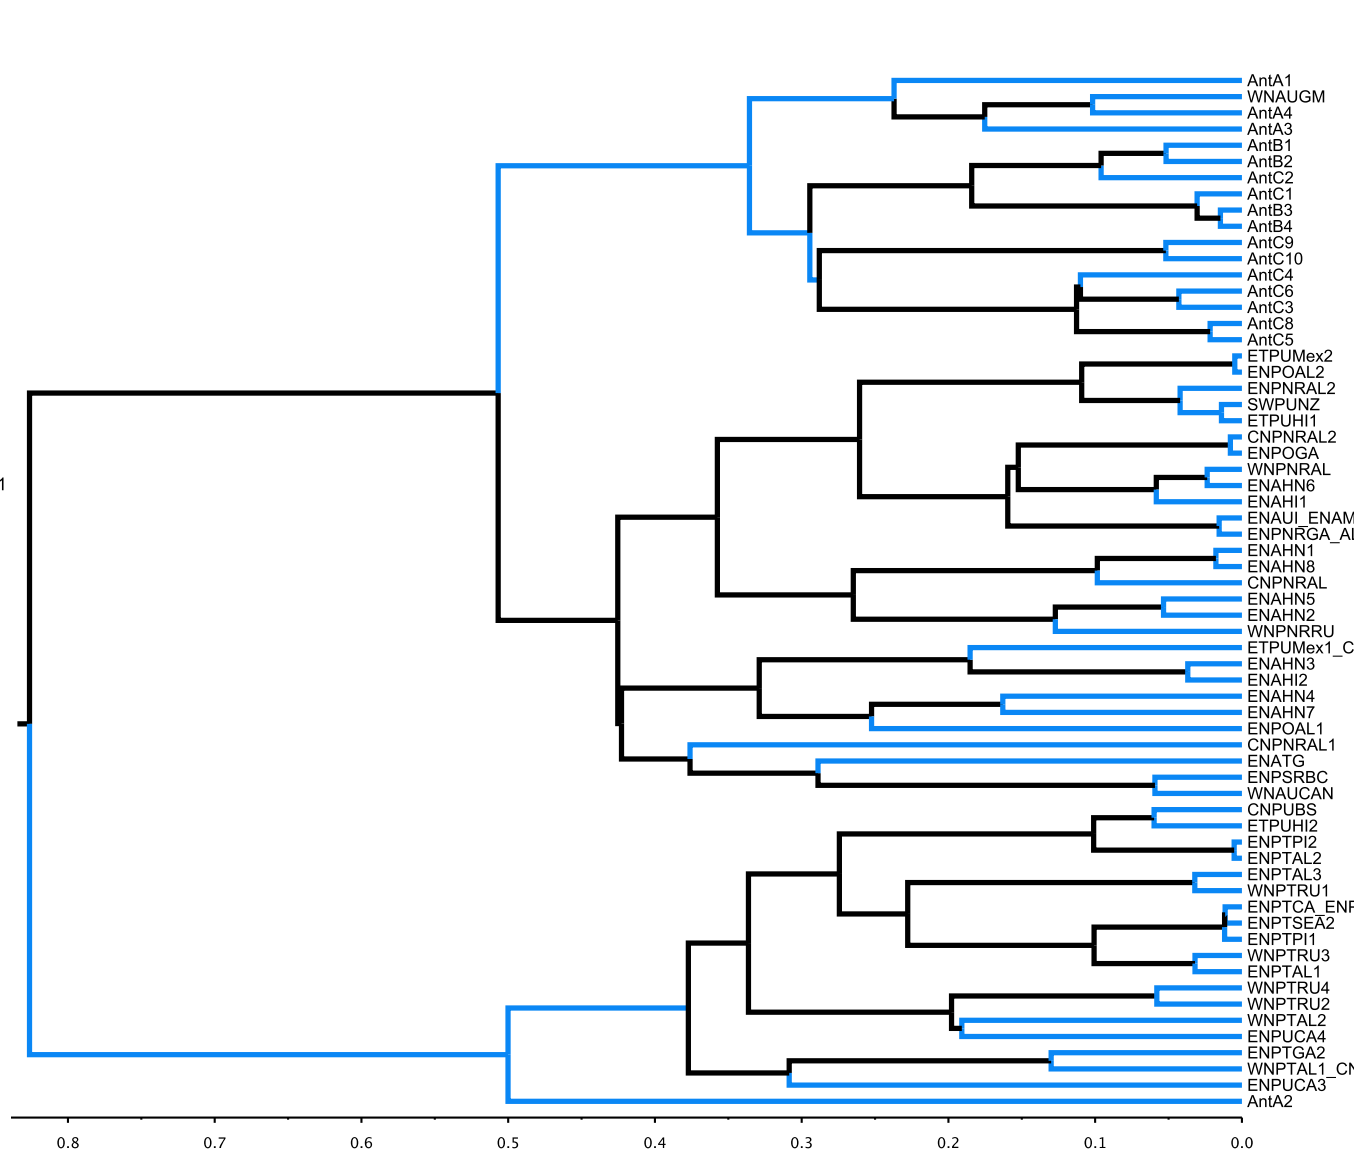

## Complete Mitogenome

## 12S16S

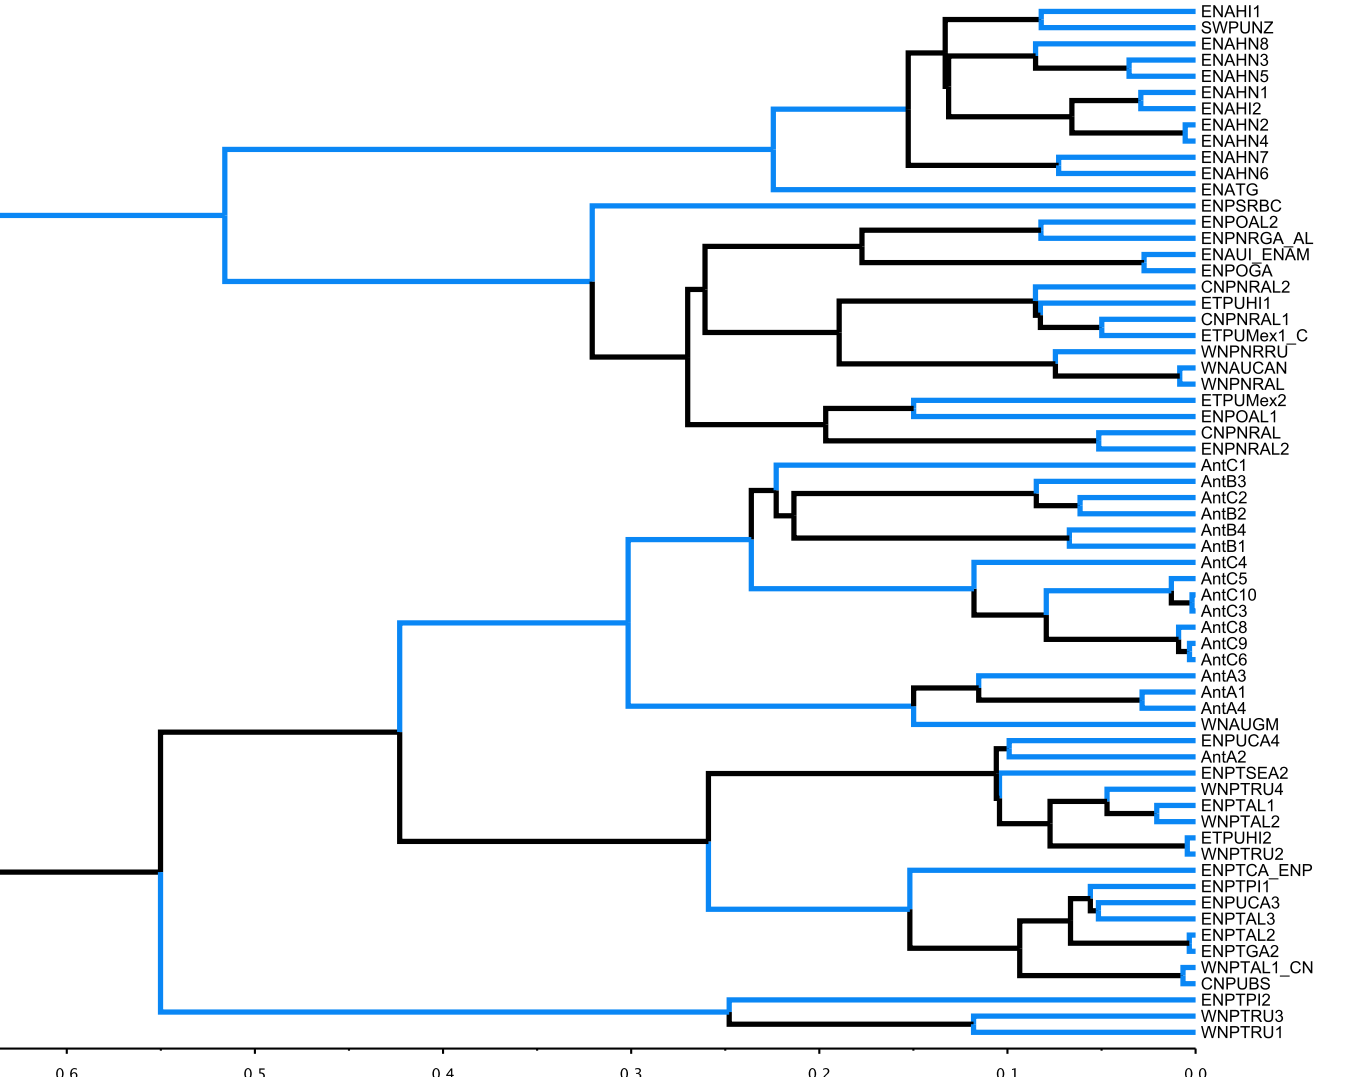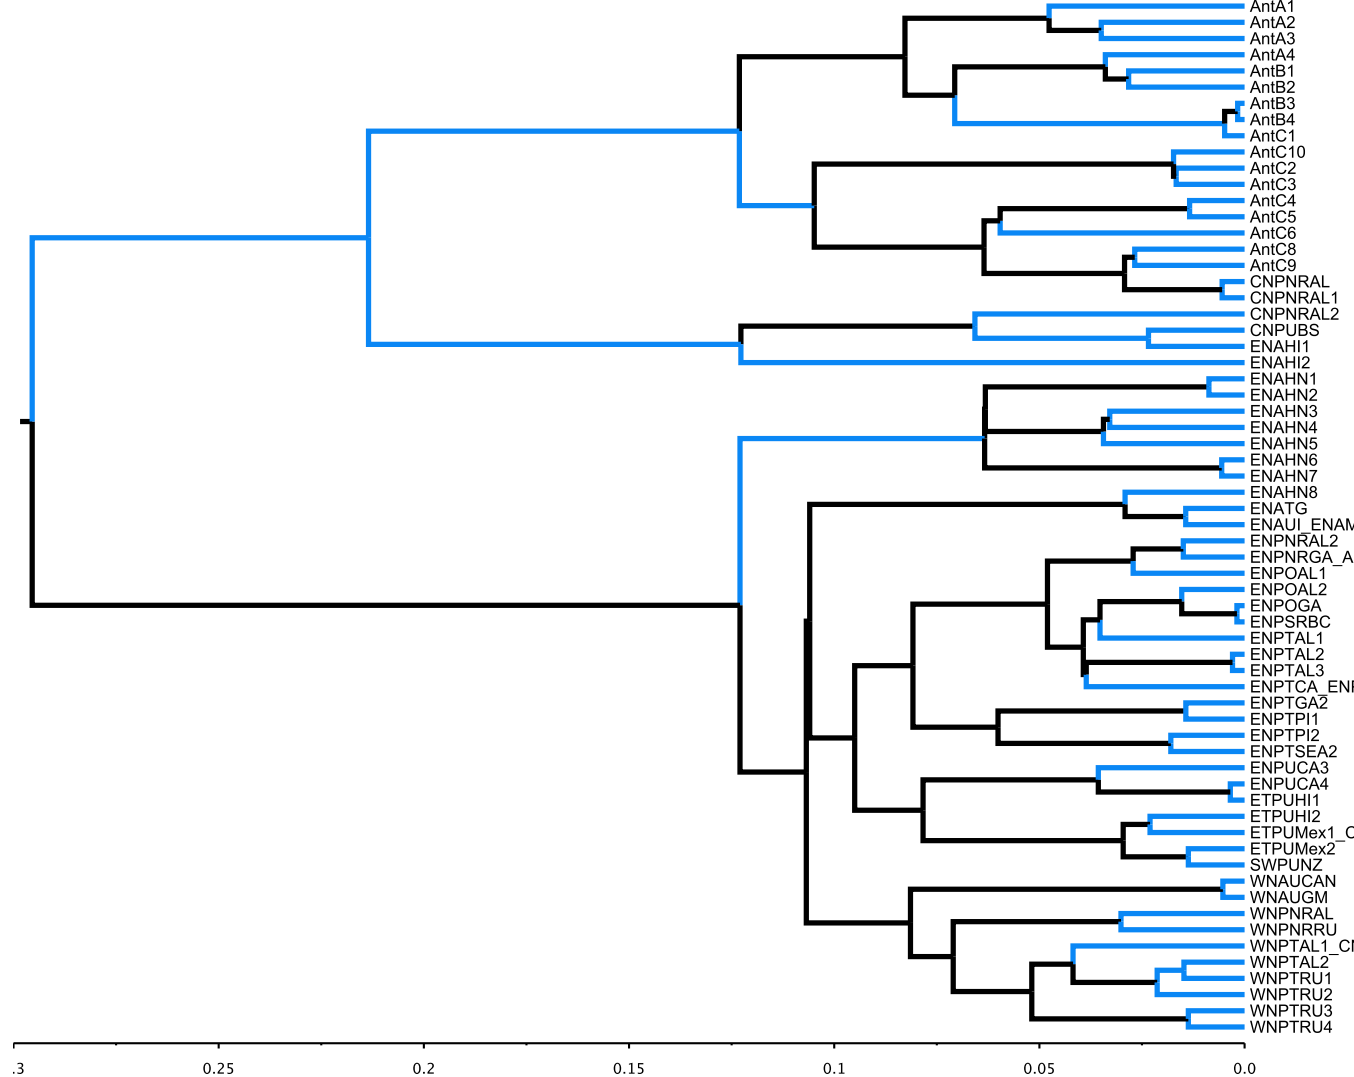

## ND1

## ND2

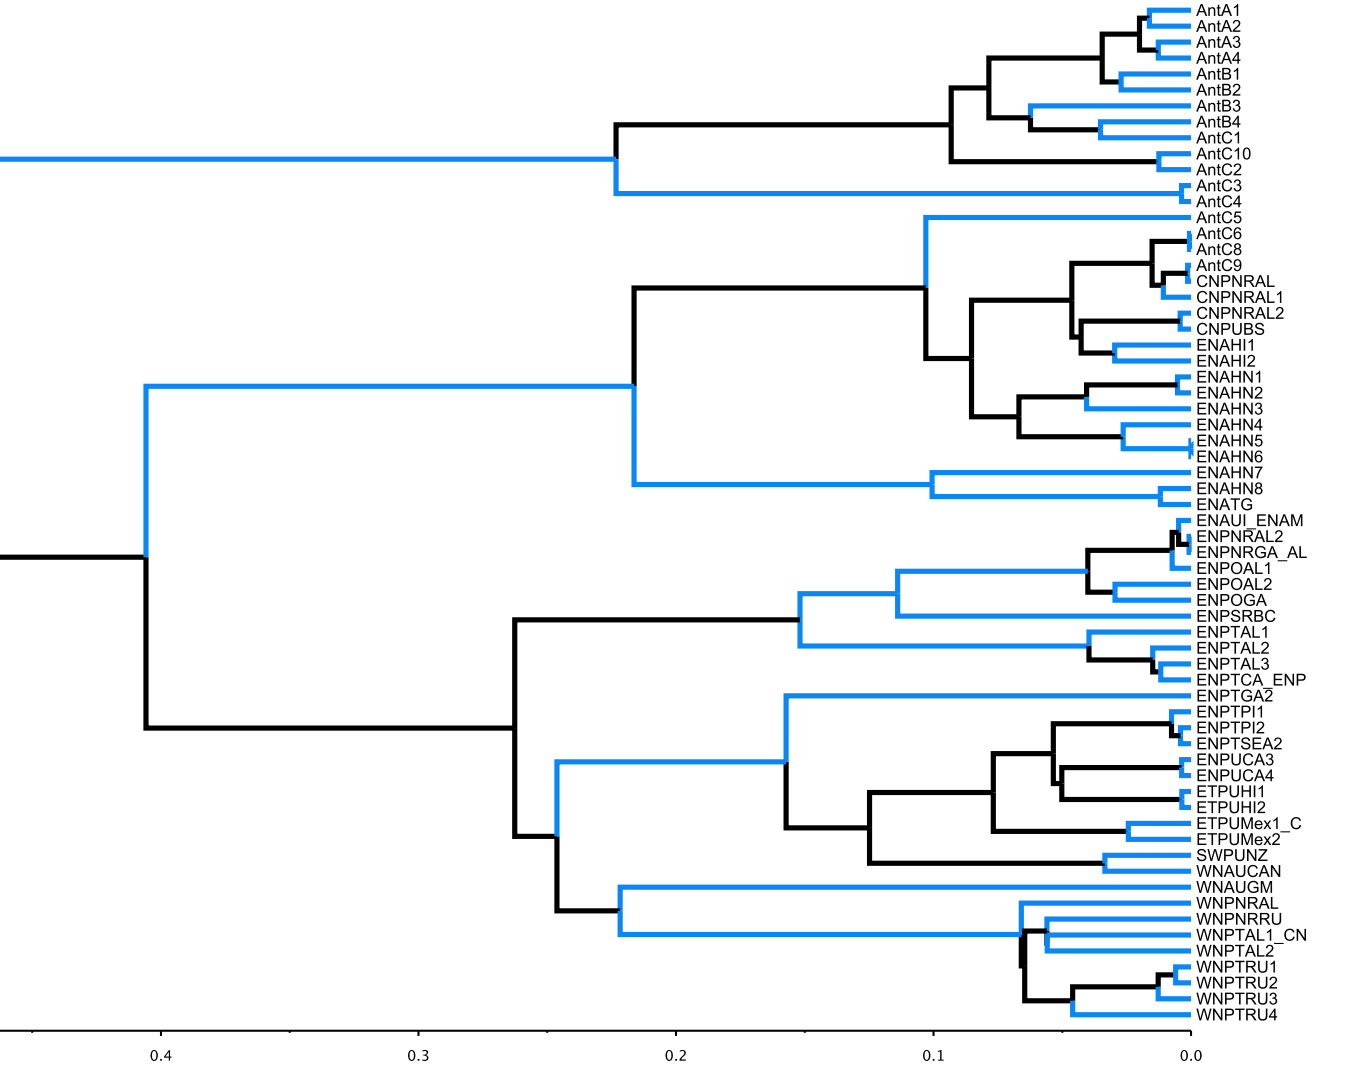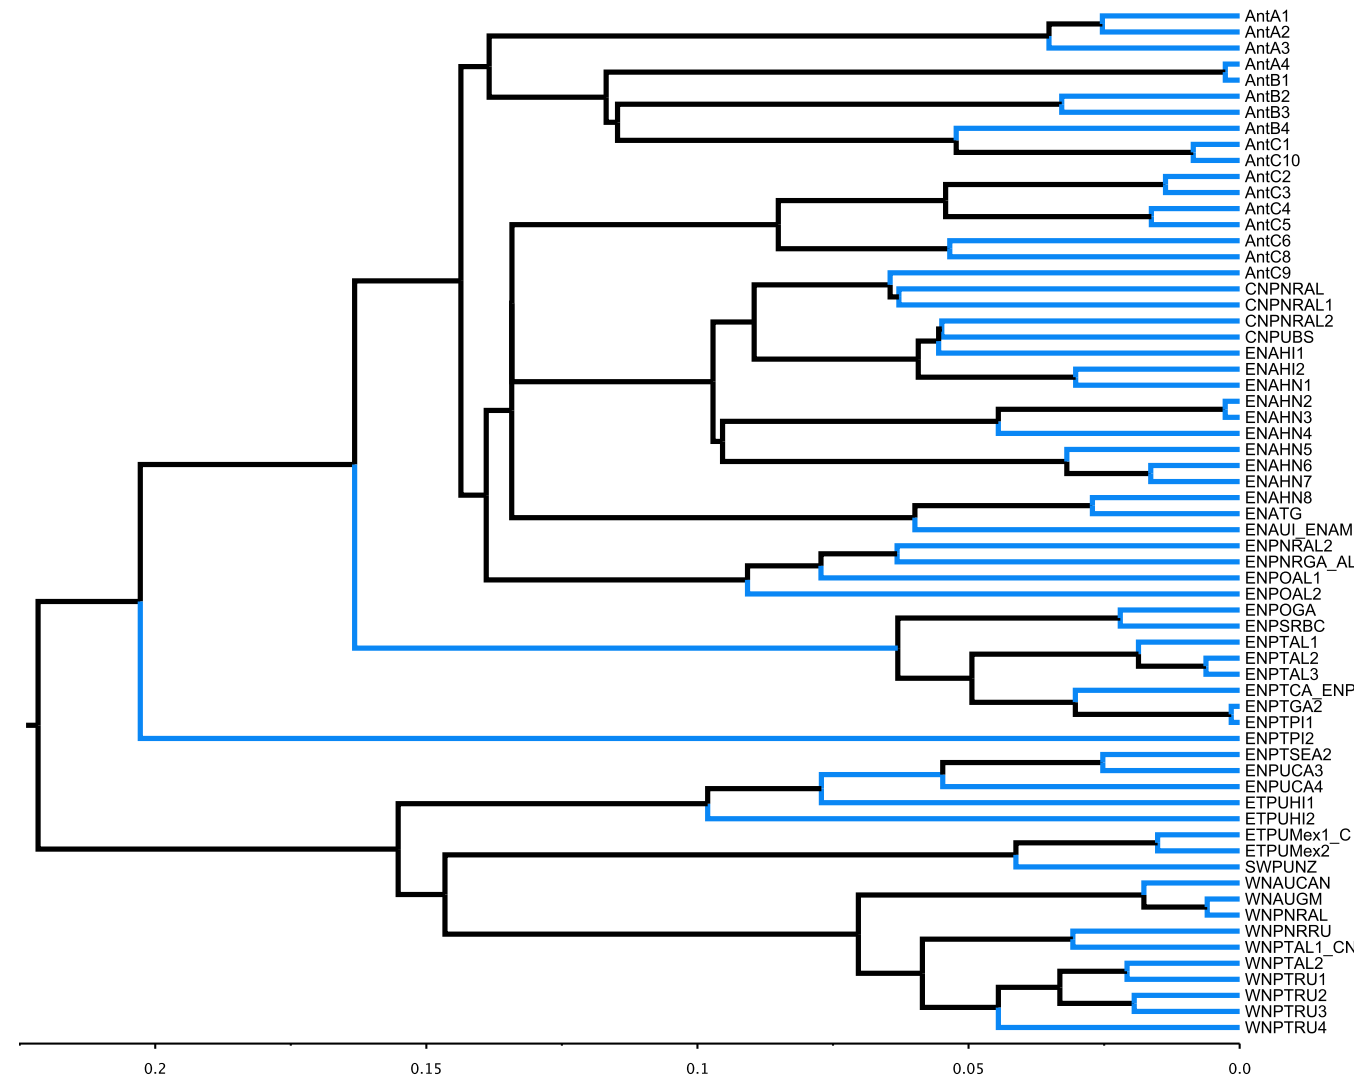

## COX1

## COX2

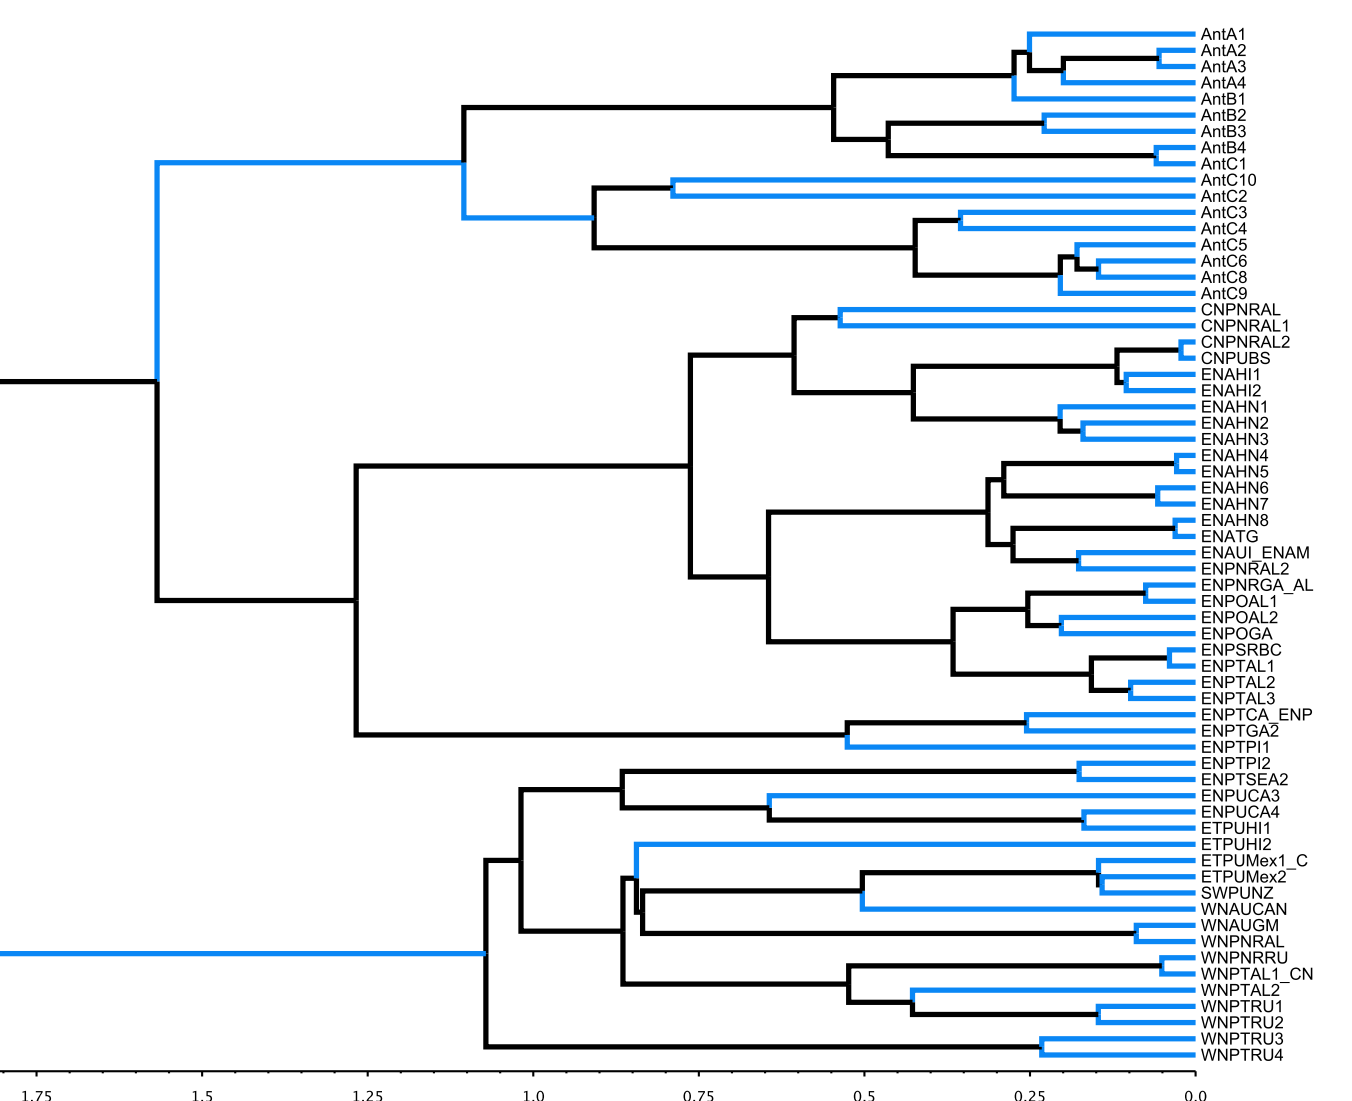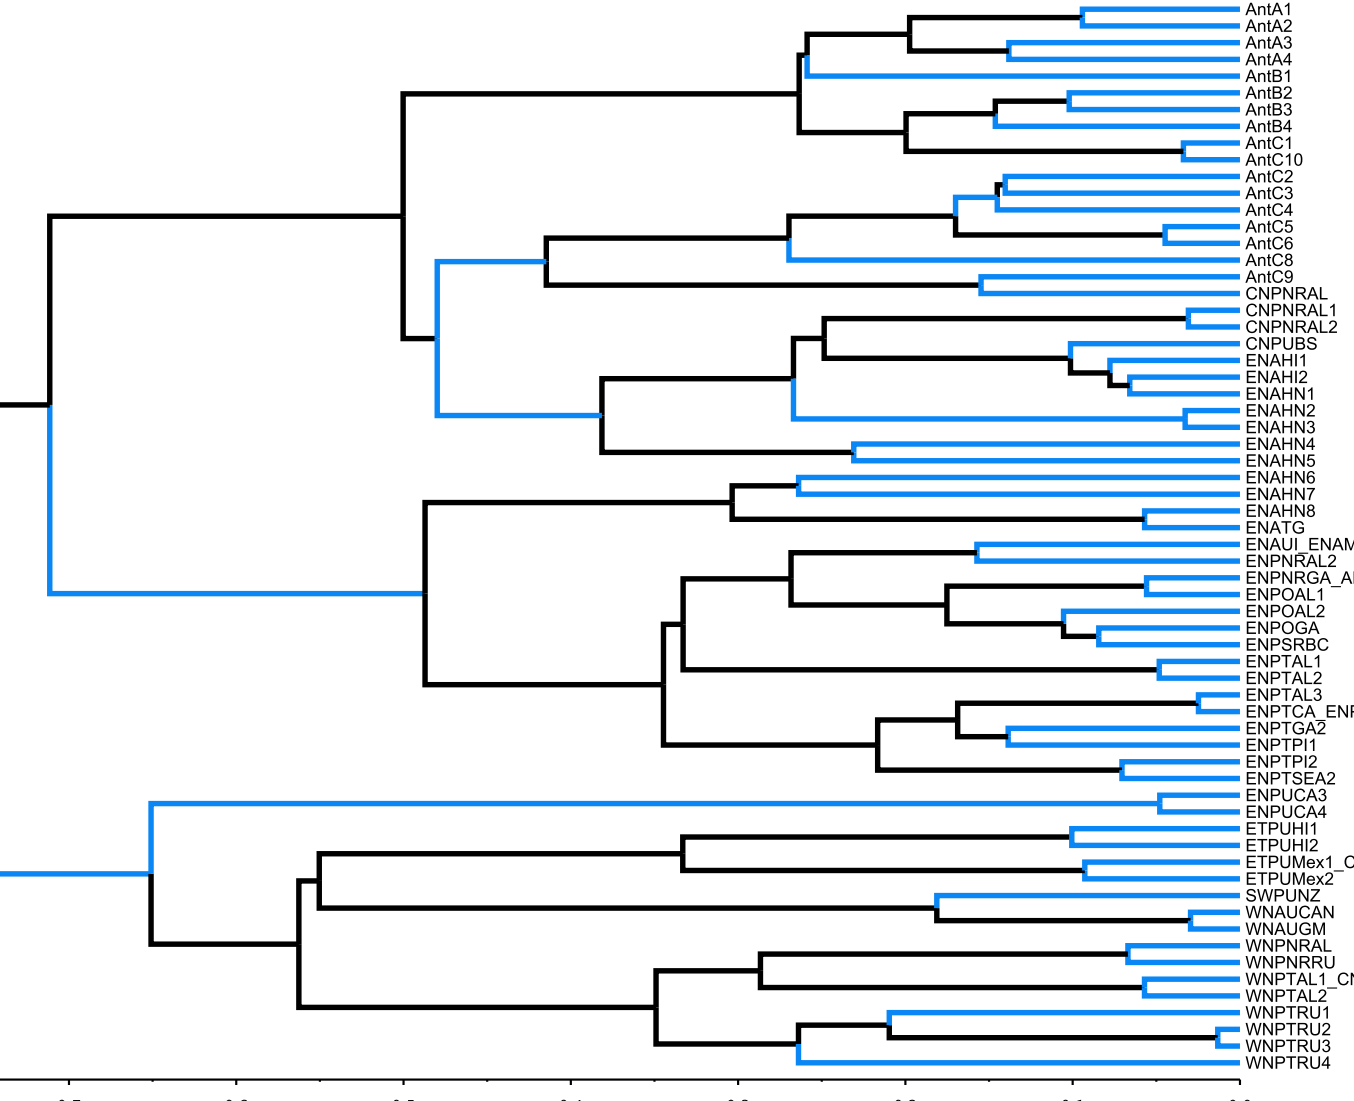

## ATP8

## ATP6

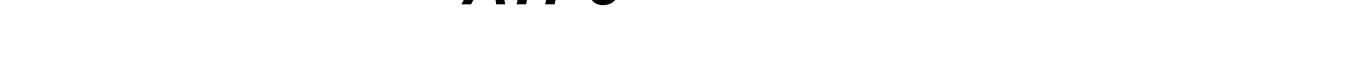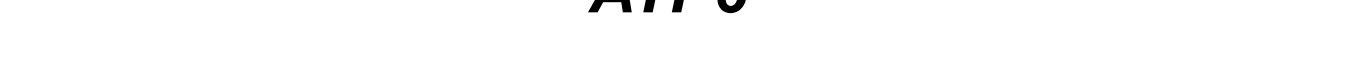

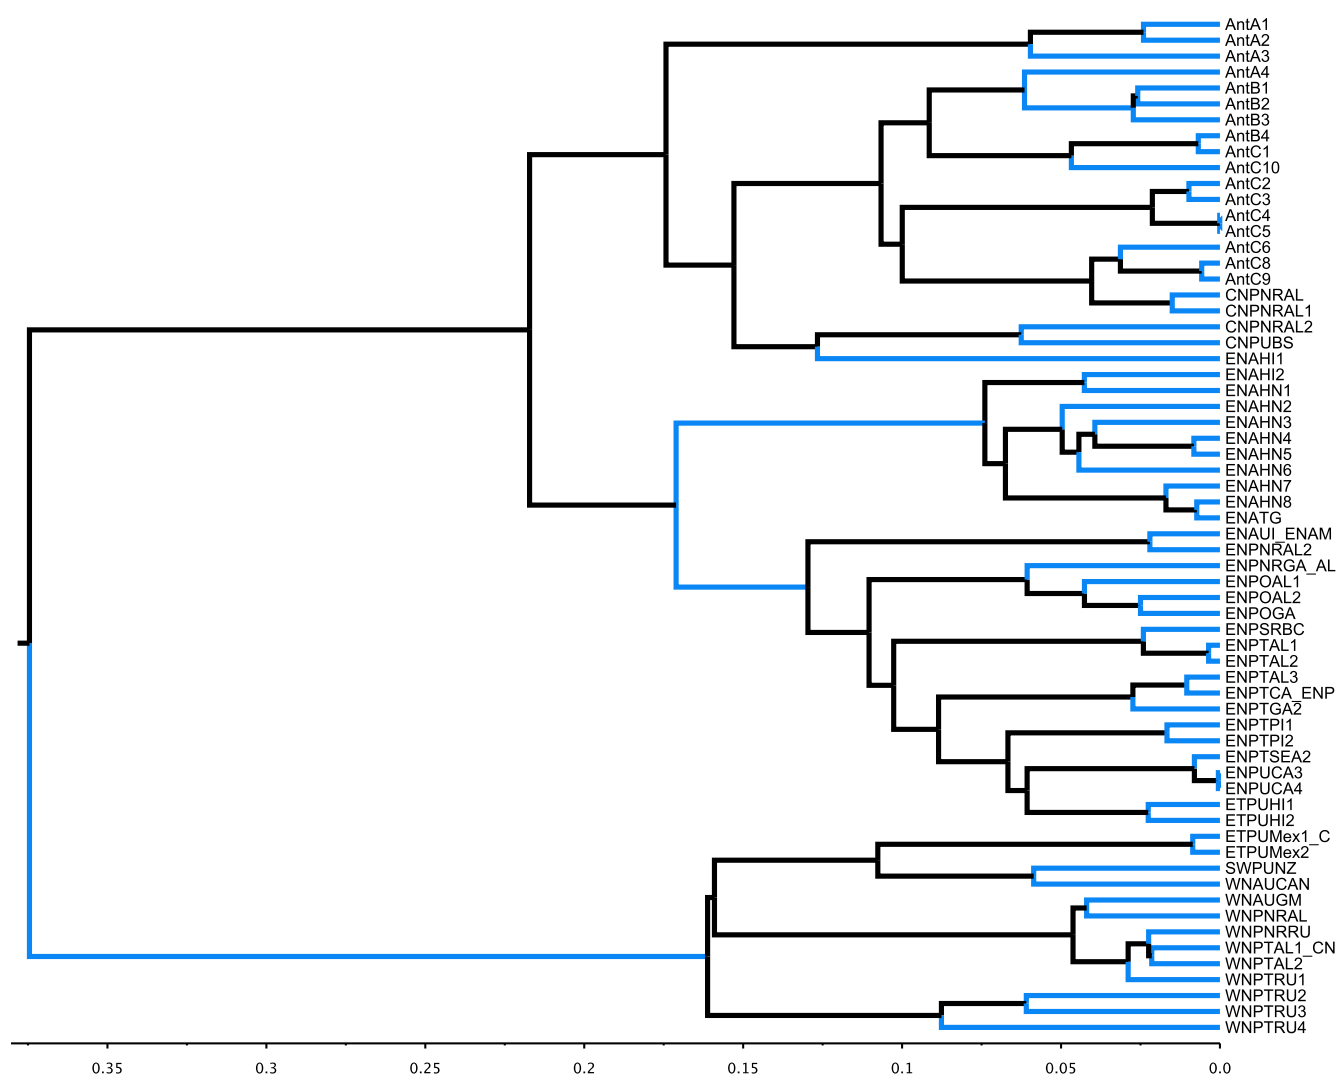

**COX3**

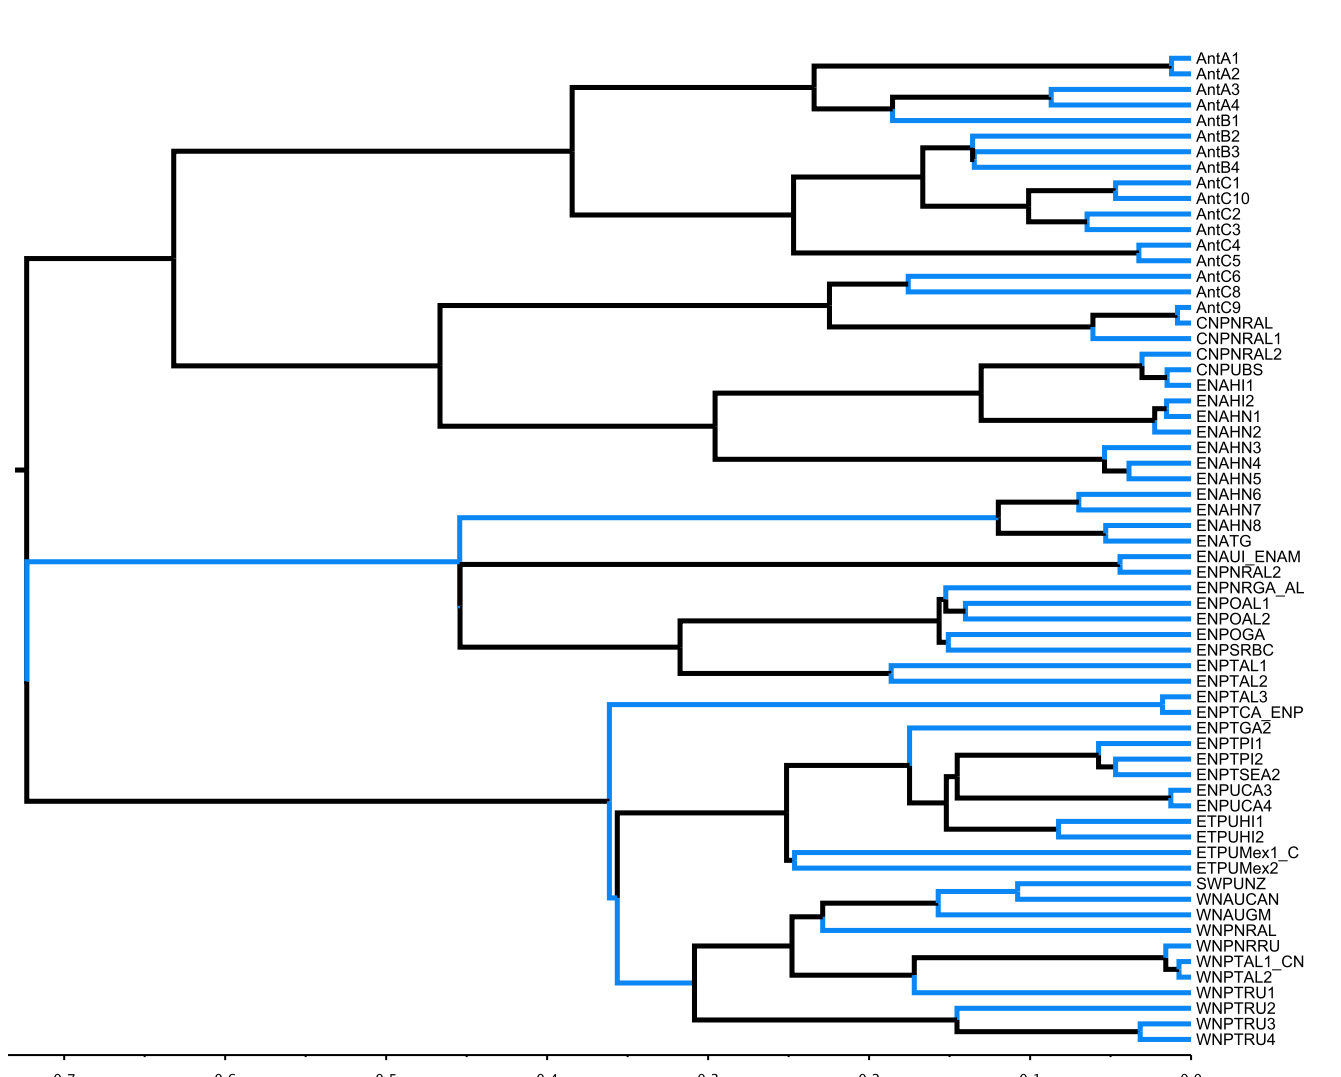

**ND3**

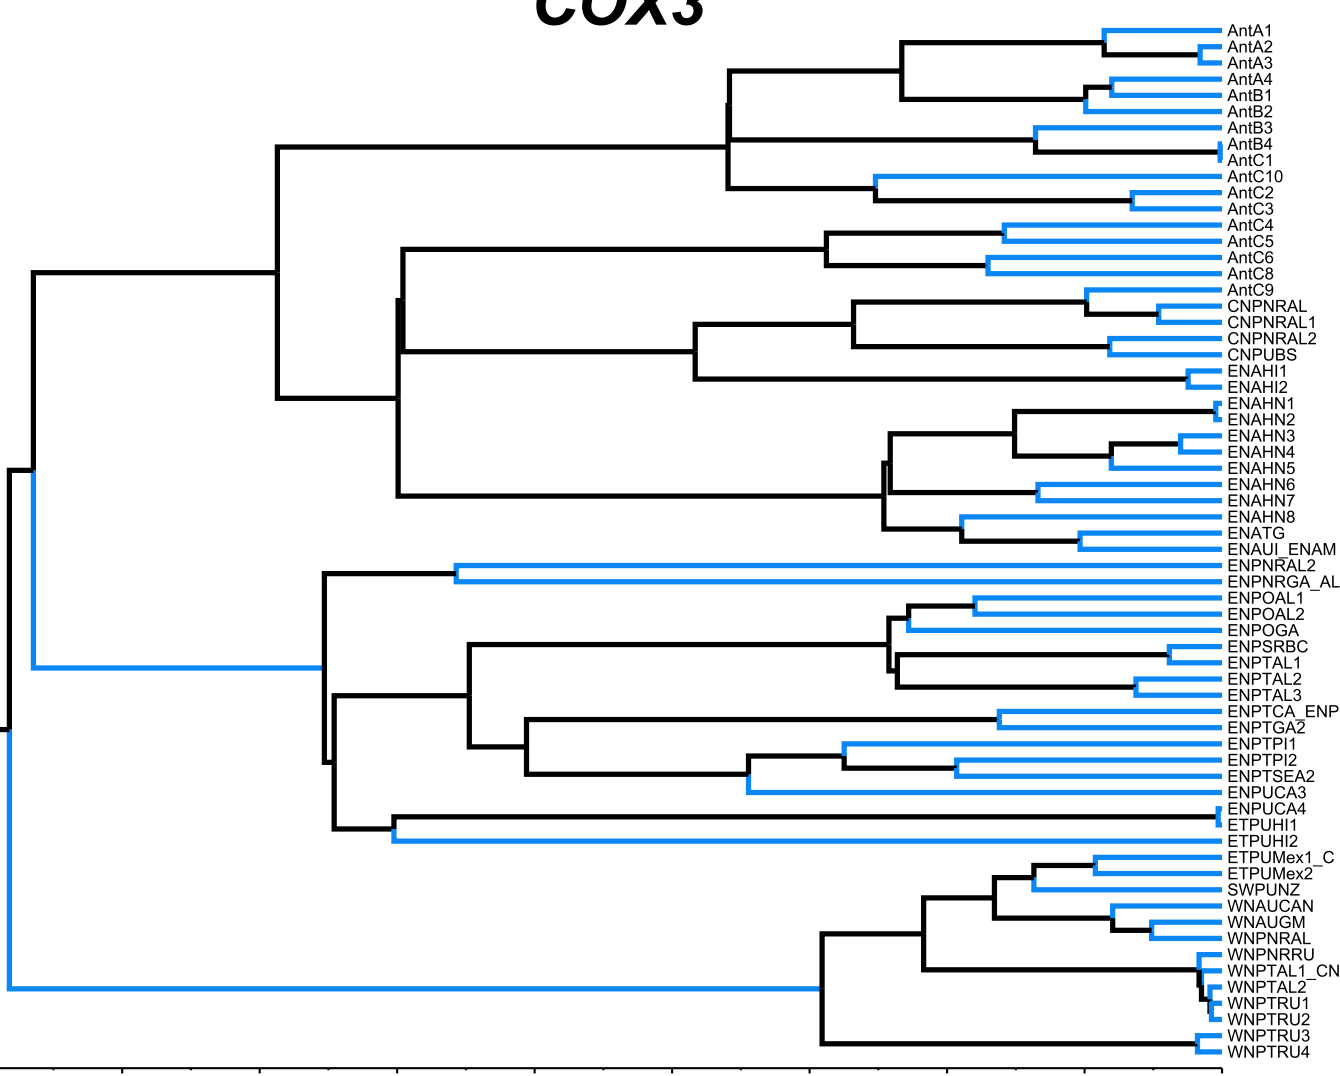

**ND4L**

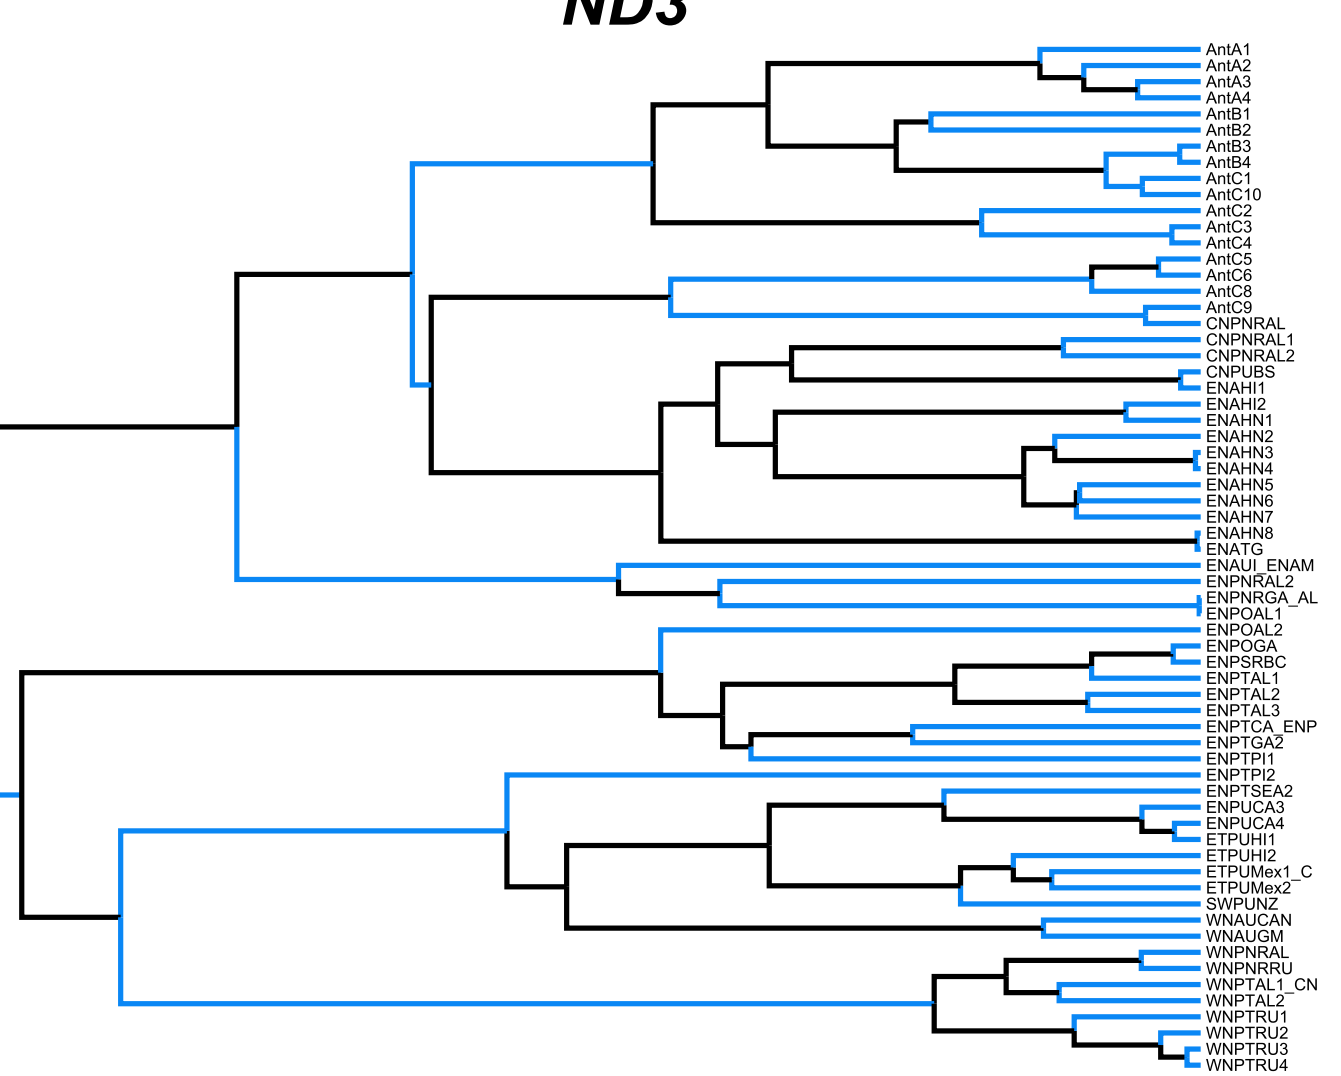

**ND4**

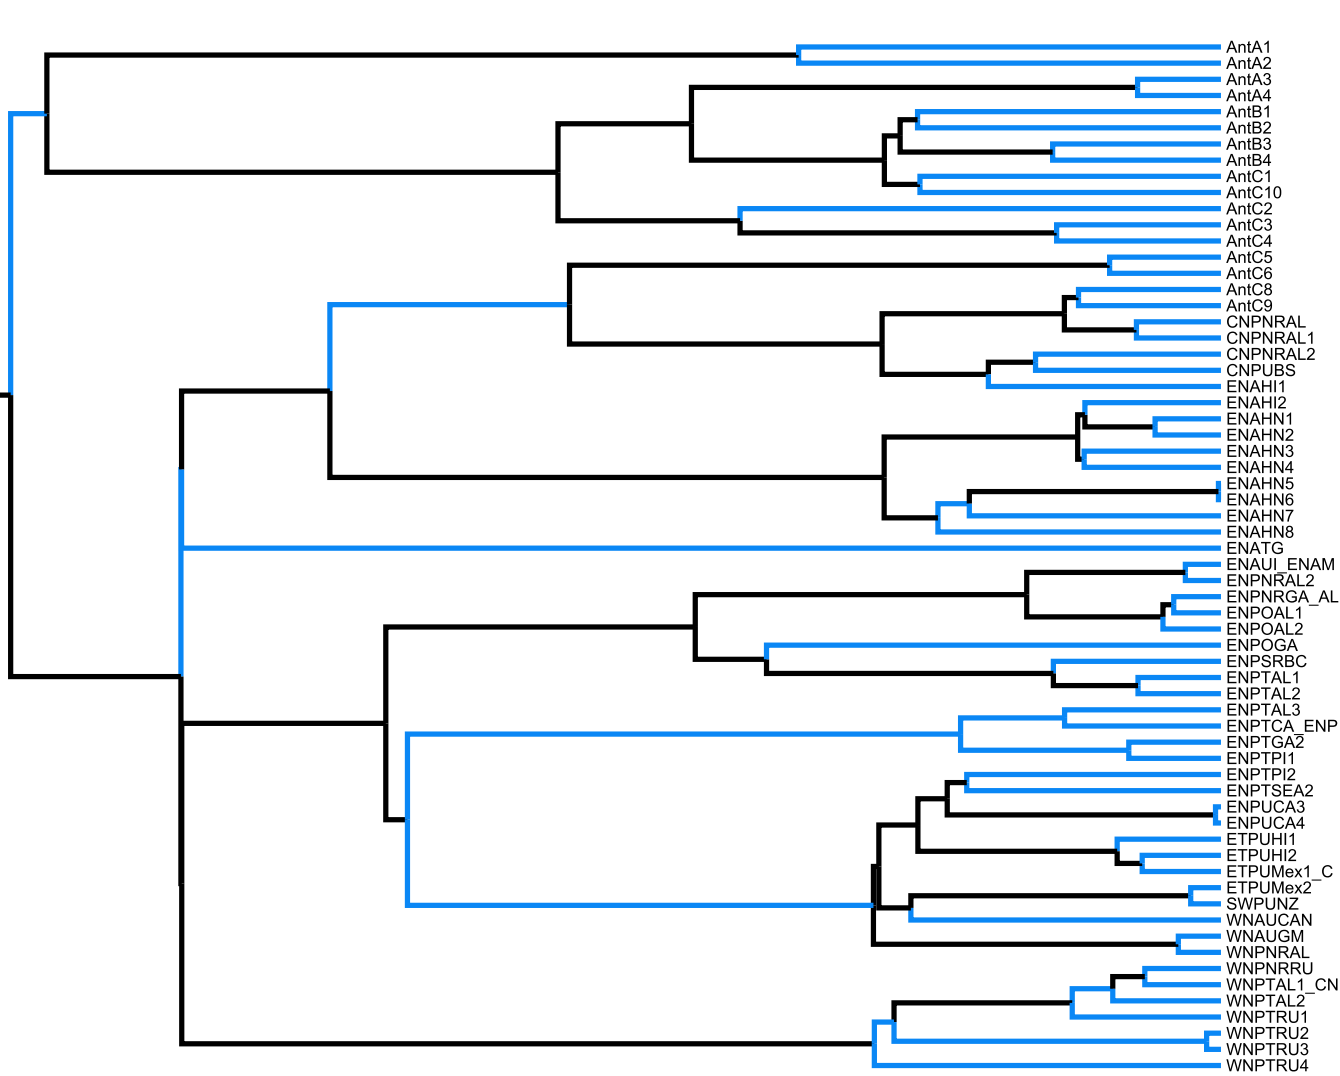

**ND5**

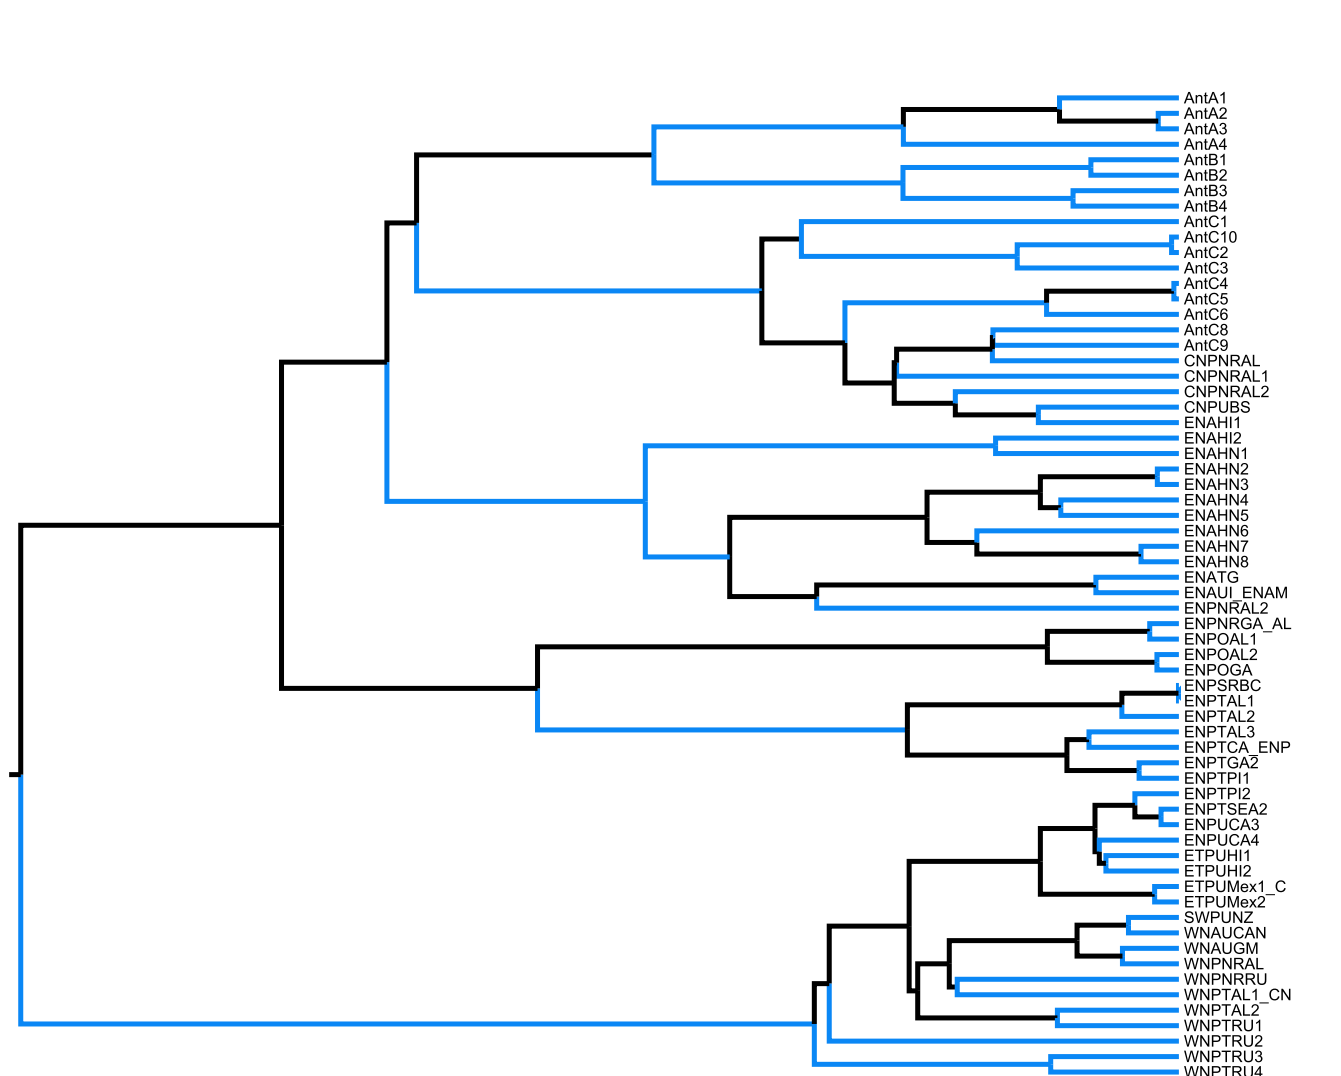

**CYTB**

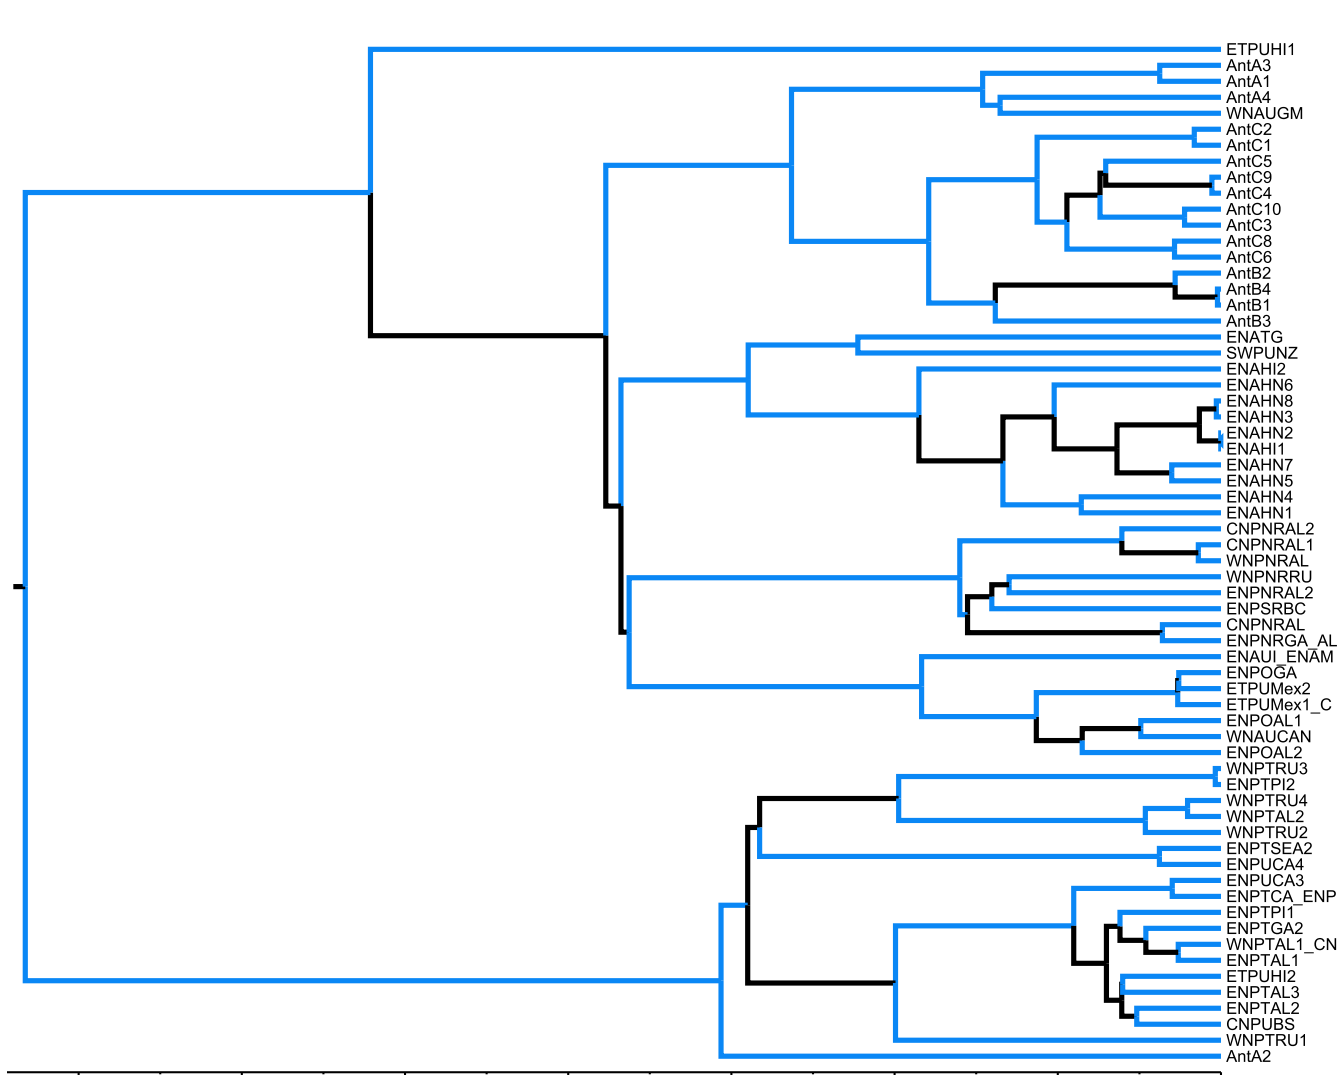

**CR**

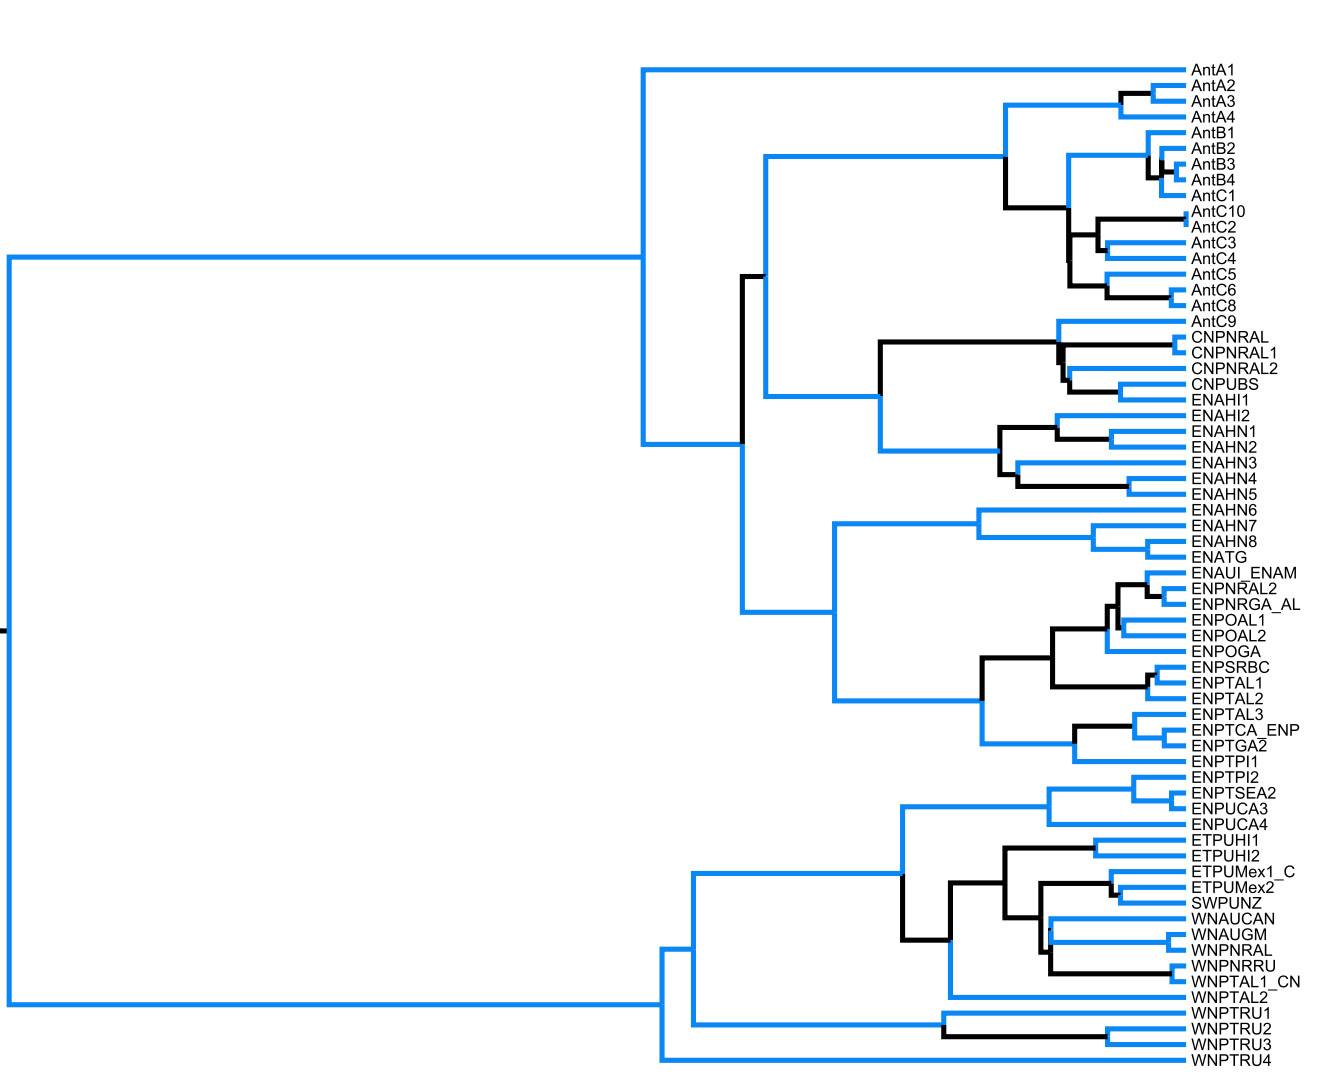

**COX1, ATP6, ND3, CYTB**





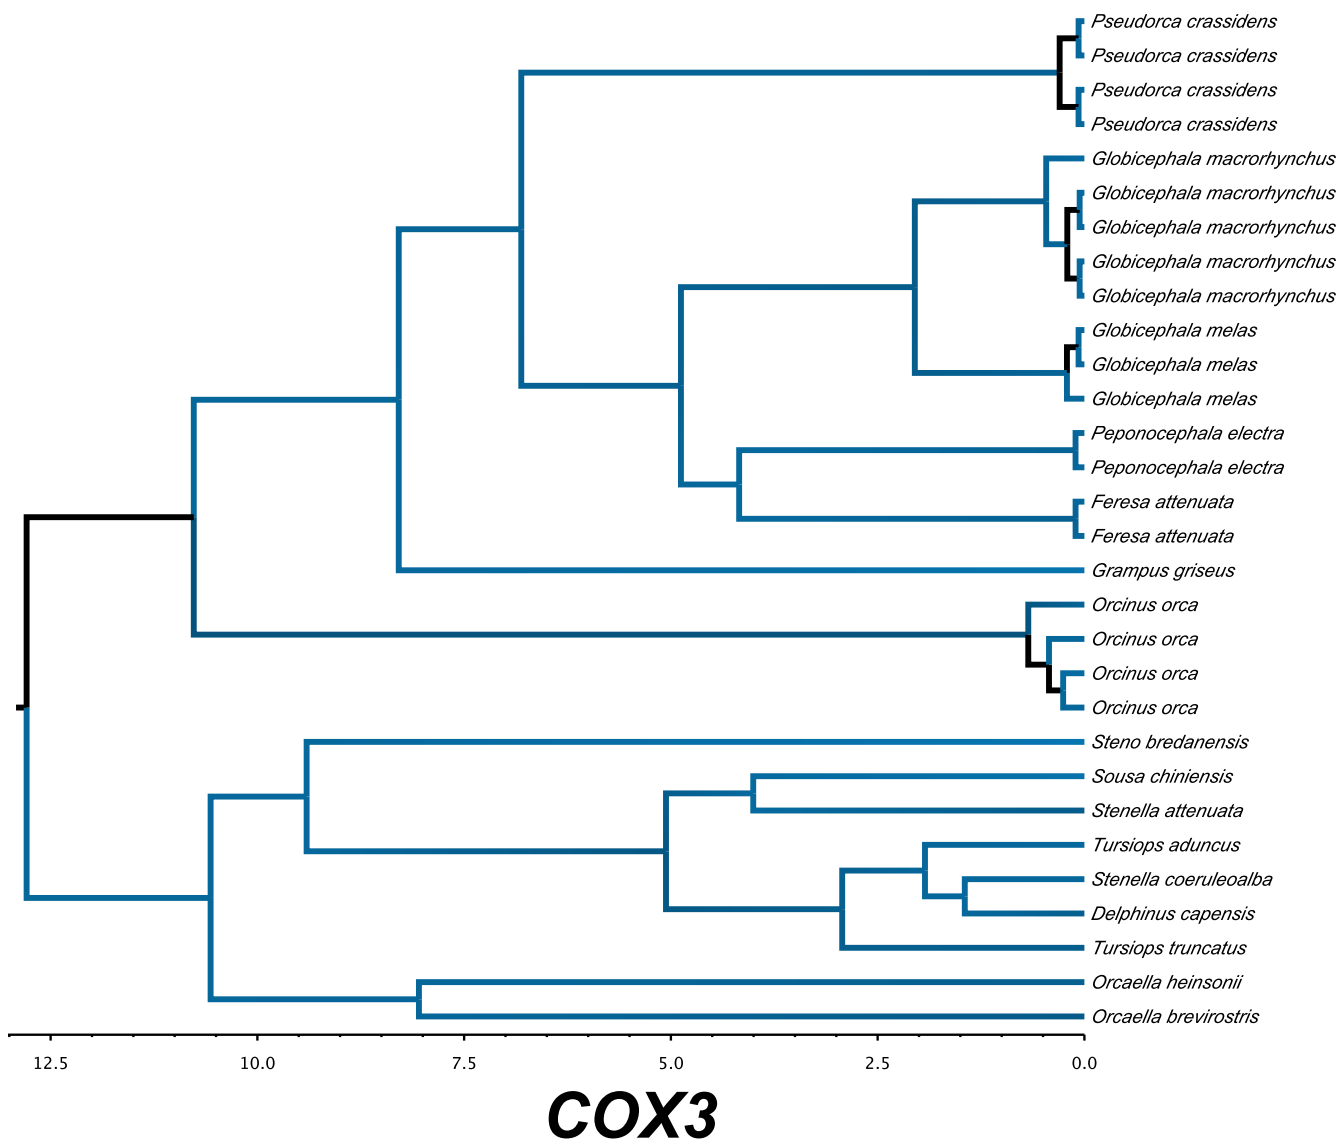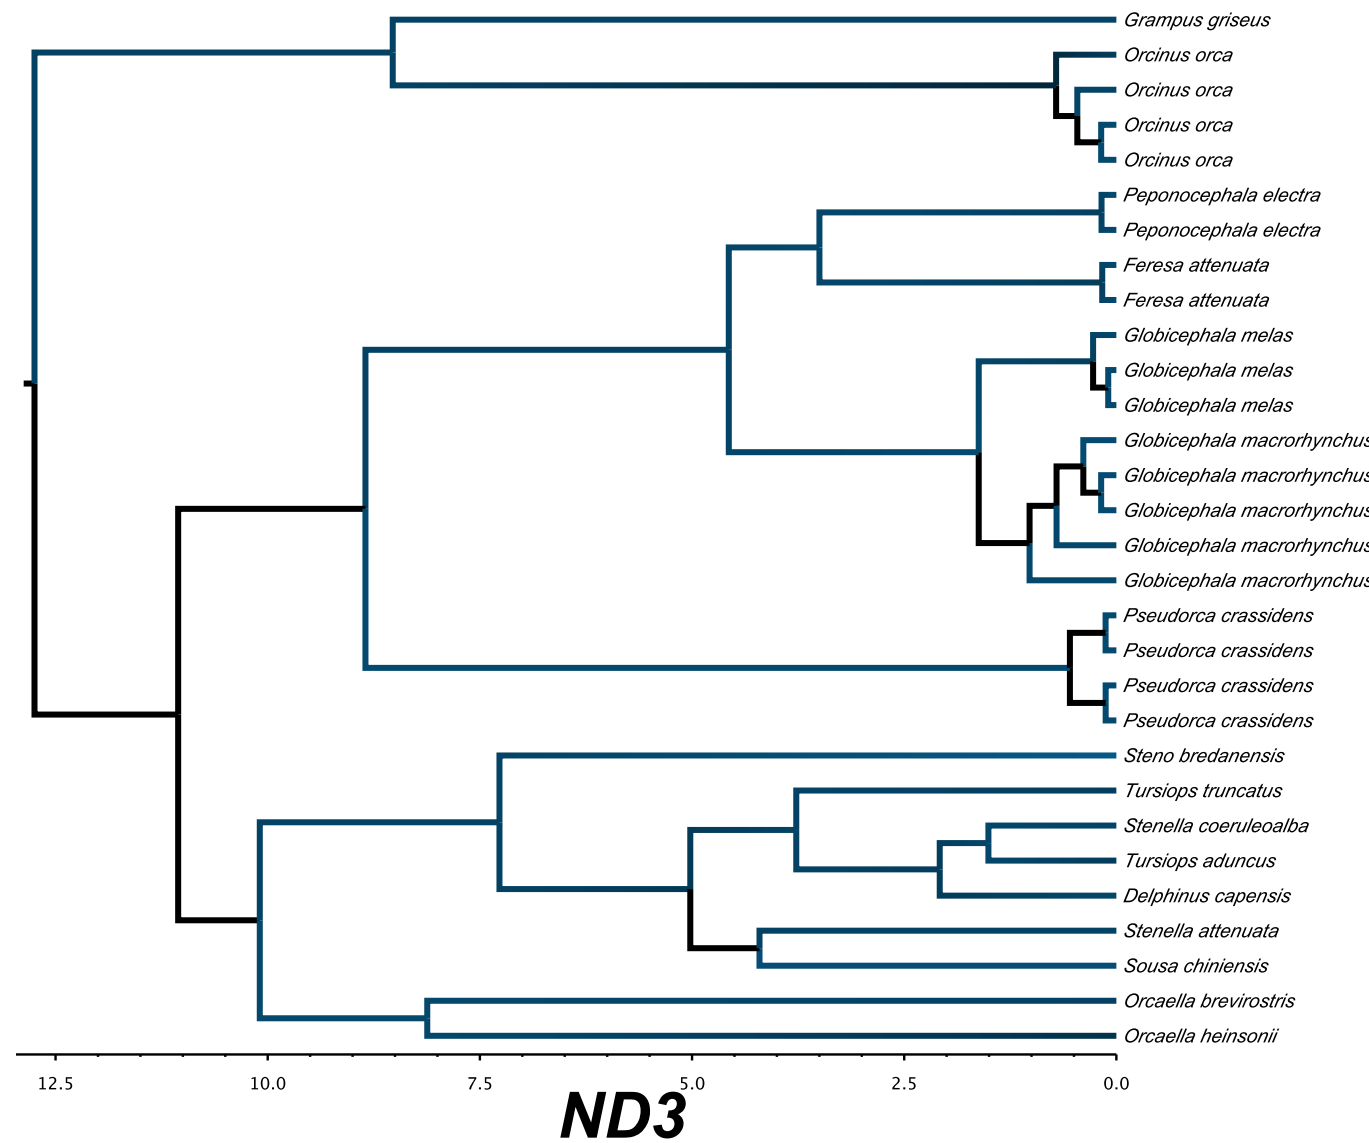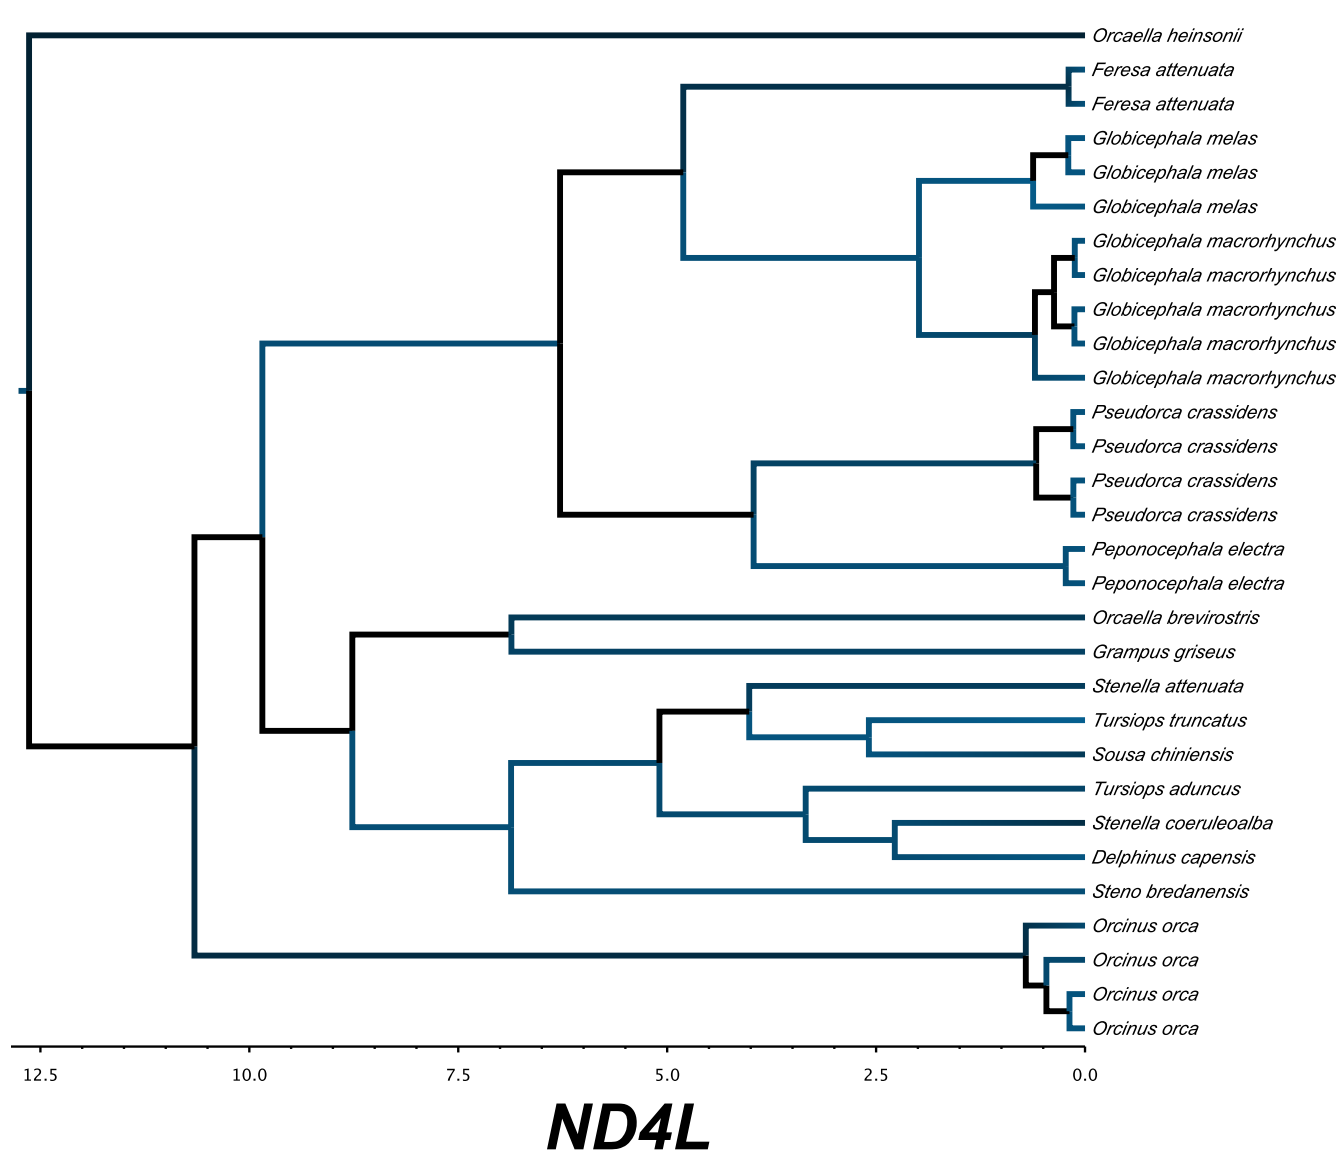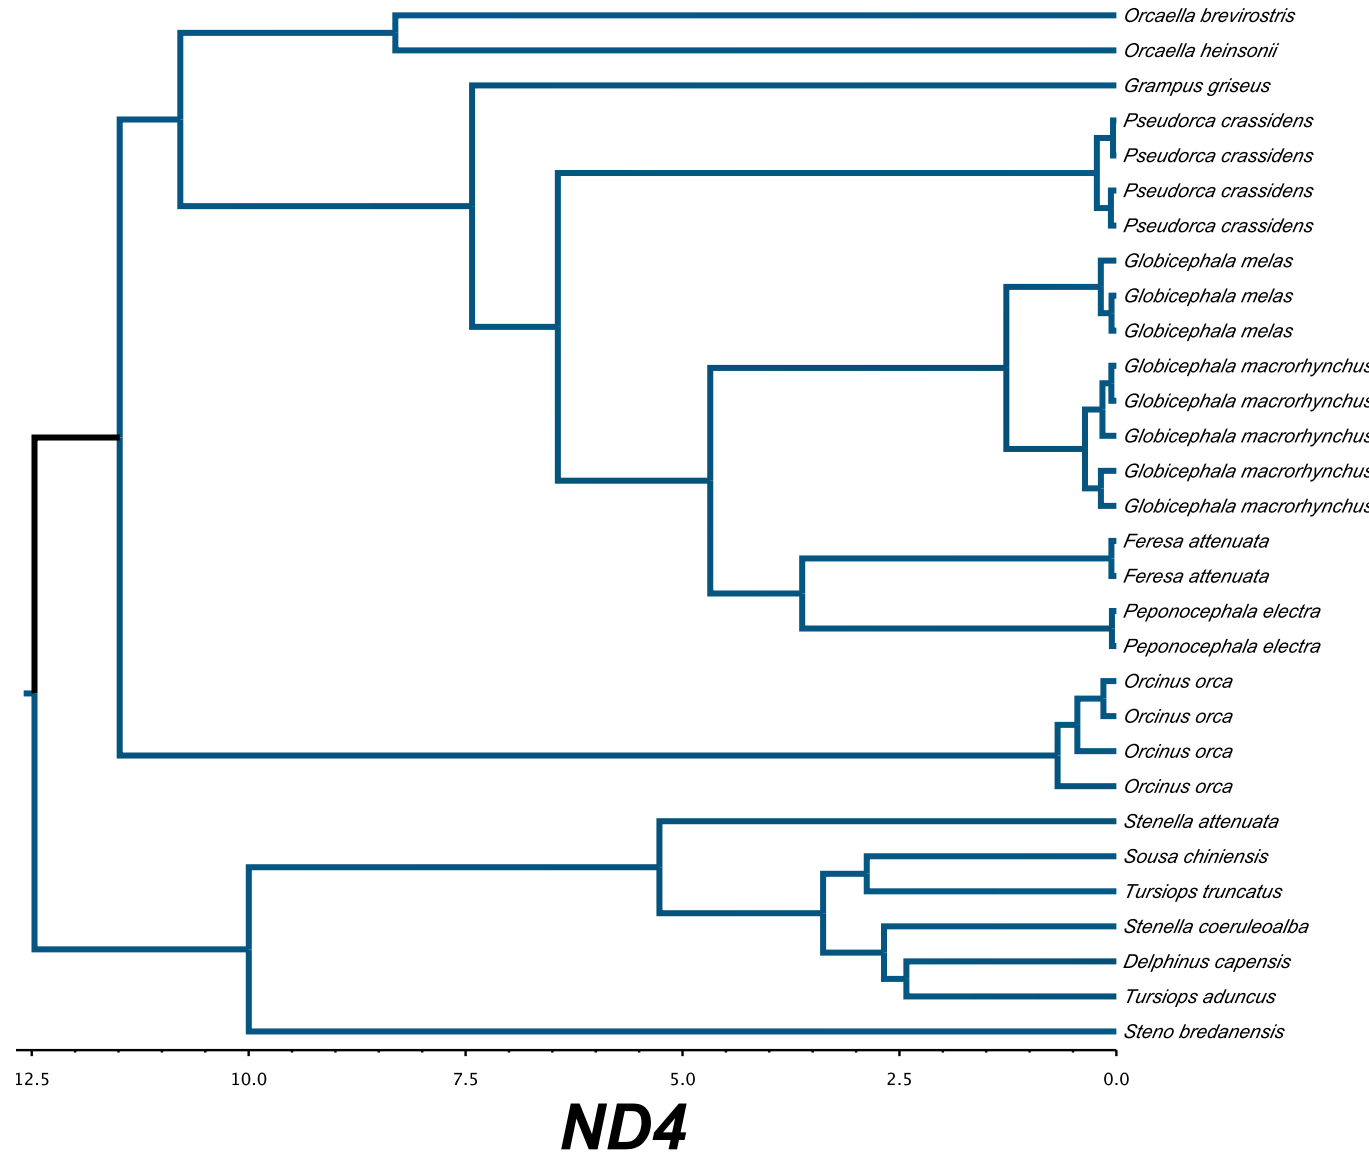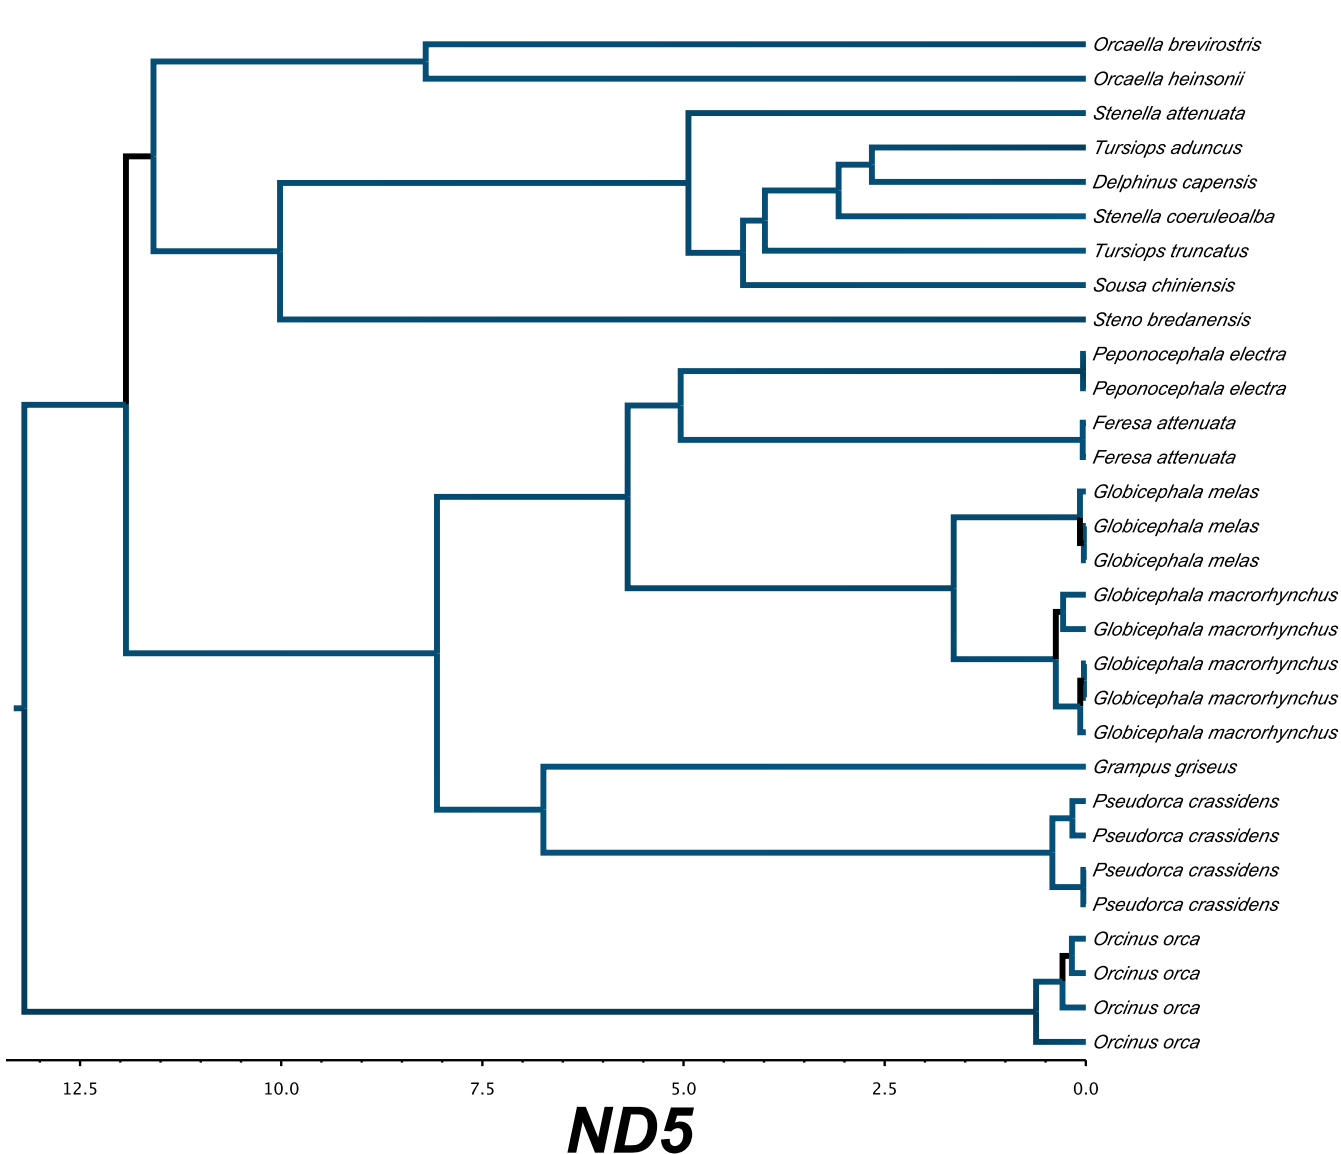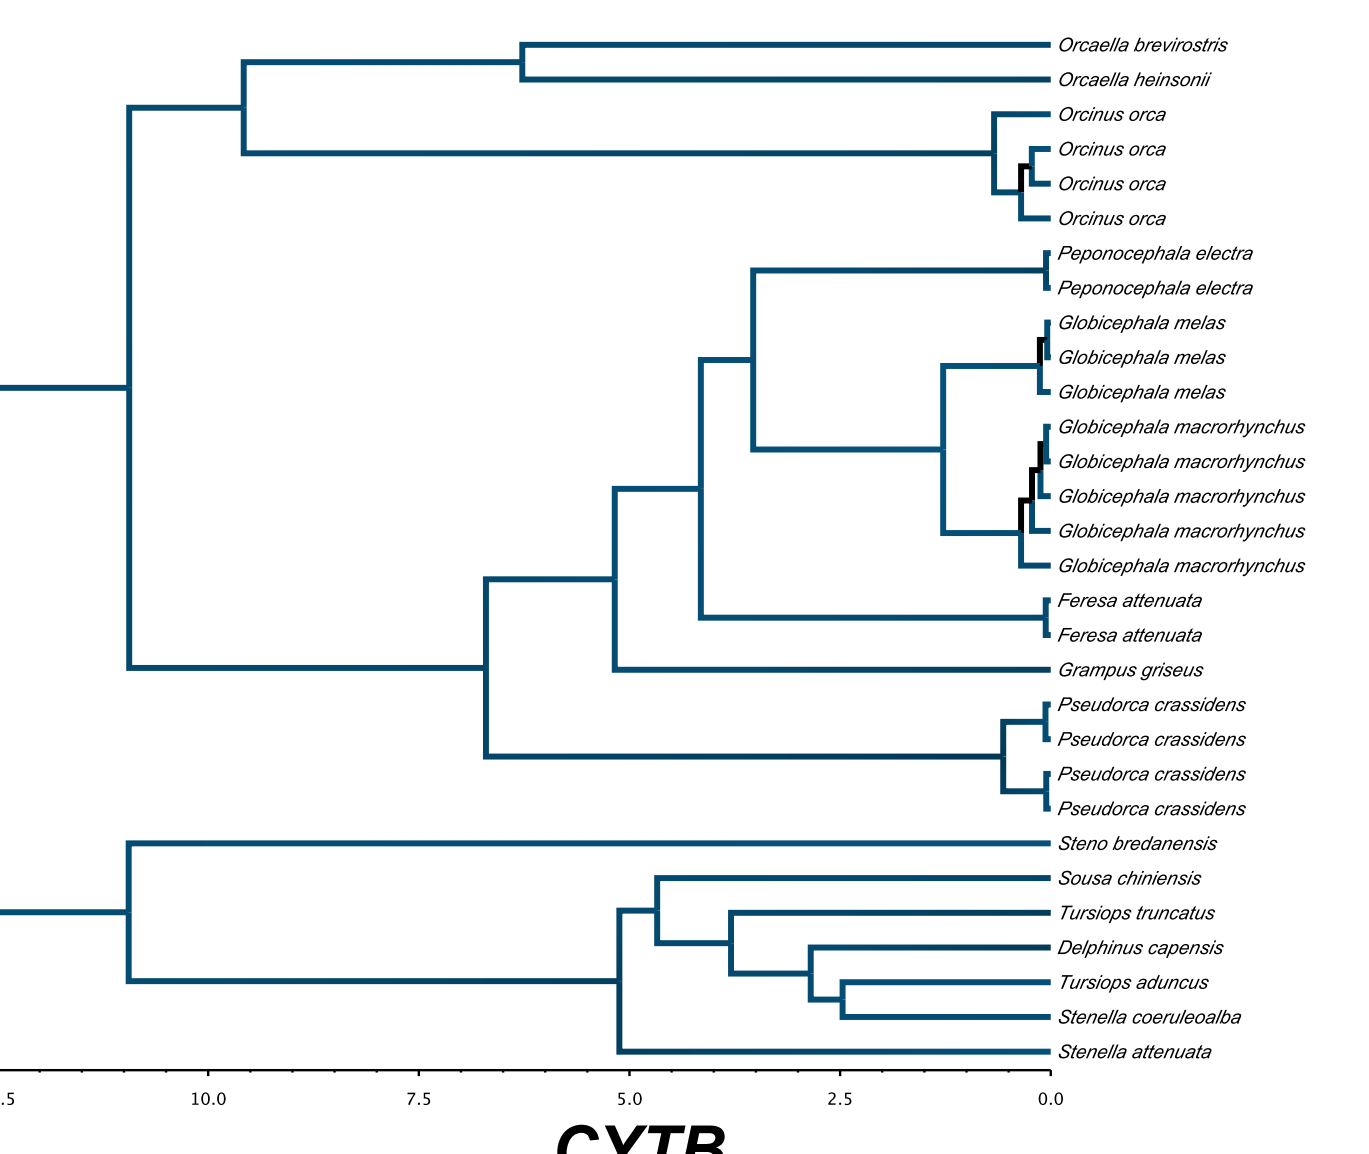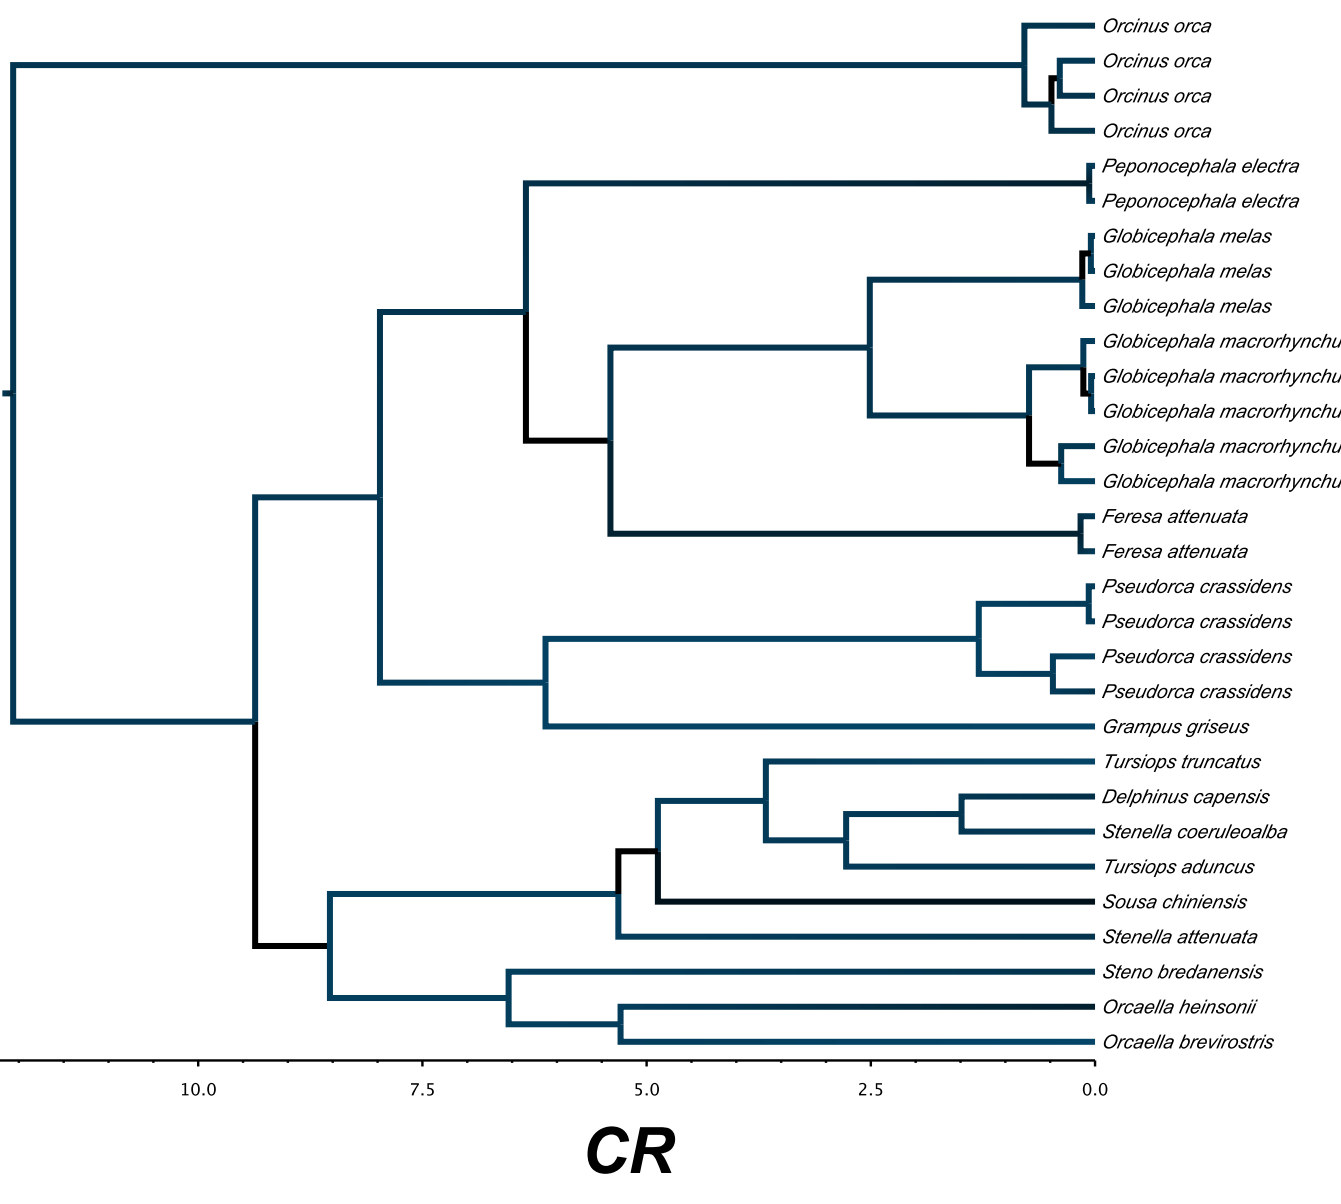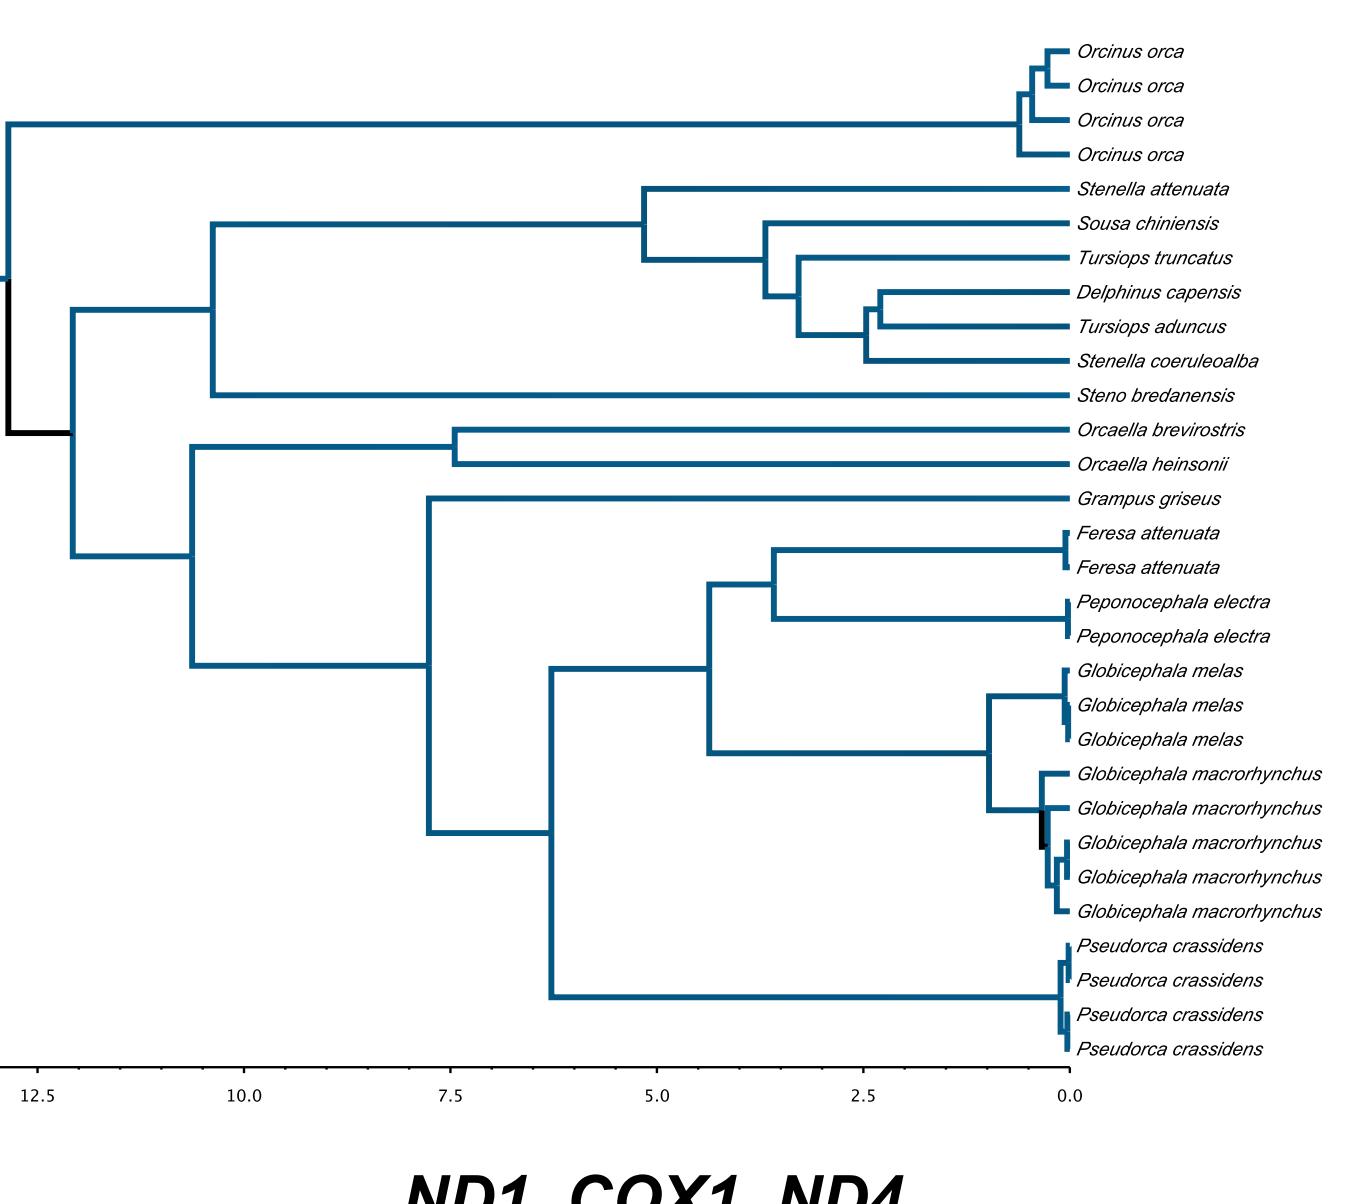

Supplement: pone.0027138.s001.pdf [file pone.0027138.s001.pdf]
